# 1 **Non-breeding waterbirds benefit from protected areas when adjusting their** 2 **distribution to climate warming**

3

4 Elie Gaget<sup>1</sup>, Diego Pavón-Jordán<sup>2</sup>, Alison Johnston<sup>3,4</sup>, Aleksi Lehikoinen<sup>5</sup>, Wesley M. Hochachka<sup>3</sup>,  
5 Brett K. Sandercock<sup>2</sup>, Alaaeldin Soultan<sup>6</sup>, Hichem Azafza<sup>7</sup>, Nadjiba Bendjedda<sup>8</sup>, Taulant Bino<sup>9</sup>, Luca  
6 Božič<sup>10</sup>, Preben Clausen<sup>11</sup>, Mohamed Dakki<sup>12</sup>, Koen Devos<sup>13</sup>, Cristi Domsa<sup>14</sup>, Vitor Encarnação<sup>15</sup>, Kiraz  
7 Erciyas-Yavuz<sup>16</sup>, Sándor Faragó<sup>17</sup>, Teresa Frost<sup>18</sup>, Clemence Gaudard<sup>19</sup>, Lívia Gosztonyi<sup>17</sup>, Fredrik  
8 Haas<sup>20</sup>, Menno Hornman<sup>21</sup>, Tom Langendoen<sup>22</sup>, Christina Ieronymidou<sup>23</sup>, Vasiliy A. Kostyushin<sup>24</sup>,  
9 Lesley J. Lewis<sup>25</sup>, Svein-Håkon Lorentsen<sup>2</sup>, Leho Luiujoe<sup>26</sup>, Włodzimierz Meissner<sup>27</sup>, Tibor Mikuska<sup>28</sup>,  
10 Blas Molina<sup>29</sup>, Zuzana Musilová<sup>30</sup>, Viktor Natykanets<sup>31</sup>, Jean-Yves Paquet<sup>32</sup>, Nicky Petkov<sup>33</sup>, Danae  
11 Portolou<sup>34</sup>, Jozef Ridzoň<sup>35</sup>, Samir Sayoud<sup>8</sup>, Marko Šćiban<sup>36</sup>, Laimonas Sniauksta<sup>37</sup>, Antra Stīpniece<sup>38</sup>,  
12 Nicolas Strebel<sup>39</sup>, Norbert Teufelbauer<sup>40</sup>, Goran Topic<sup>41</sup>, Danka Uzunova<sup>42</sup>, Andrej Vizi<sup>43</sup>, Johannes  
13 Wahl<sup>44</sup>, Marco Zenatello<sup>45</sup> & Jon E. Brommer<sup>1</sup>

14

15 <sup>1</sup> Department of Biology, University of Turku, Turku, Finland

16 <sup>2</sup> Department of Terrestrial Ecology, Norwegian Institute for Nature Research (NINA), P.O. Box 5685  
17 Sluppen, N-7485 Trondheim, Norway

18 <sup>3</sup> Cornell Lab of Ornithology, Cornell University, Ithaca, NY 14850

19 <sup>4</sup> ConservationScience Group, Department of Zoology, University of Cambridge, CB2 3QZ Cambridge,  
20 United Kingdom

21 <sup>5</sup> *The Finnish Museum of Natural History, P.O. Box 17, 00014 University of Helsinki, Finland;*

22 <sup>6</sup> Department of Ecology, Swedish University of Agricultural Sciences, Uppsala, Sweden

23 <sup>7</sup> Les Amies des Oiseaux (AAO), Ariana, Tunisia

24 <sup>8</sup> Direction générale des Forêts, Ben Aknoun, Alger, Algérie

25 <sup>9</sup> Albanian Ornithological Society, Bulevardi "Gjergj Fishta", Kulla nr.2, kati 4, hyrja 18, Tirana,  
26 Albania

27 <sup>10</sup> Društvo za opazovanje in proučevanje ptic Slovenije (DOPPS), Tržaška cesta 2, SI-1000 Ljubljana,  
28 Slovenia

29 <sup>11</sup> Department of Biosciences, Aarhus University, Rønde, Denmark

30 <sup>12</sup> Scientific Institute, Mohammed V University of Rabat, Av. Ibn Battota, 10106 Rabat-Agdal,  
31 Morocco

32 <sup>13</sup> Research Institute for Nature and Forest, Brussel, Belgium

33 <sup>14</sup> Romanian Ornithological Society, Bd. Hristo Botev, nr.3, ap. 6 Cod 030231, Sector 3, București,  
34 Romania

- 35 <sup>15</sup> Instituto da Conservação da Natureza e das Florestas, IP (ICNF), Centro de Estudos de Migrações  
36 e Proteção de Aves (CEMPA), Lisboa, Portugal
- 37 <sup>16</sup> Ornithological Research Center, Ondokuz Mayıs University, 55139 Samsun, Turkey
- 38 <sup>17</sup> Institut für Wildwirtschaft und Wirbeltier Zoologie, Universität Sopron, H-9400 Sopron, Bajcsy-  
39 Zsilinszky u. 4, Ungarn
- 40 <sup>18</sup> British Trust for Ornithology, Thetford, UK
- 41 <sup>19</sup> LPO-BirdLife France, Fonderies Royales, Rochefort Cedex, France
- 42 <sup>20</sup> Department of Biology, Lund University, Lund, Sweden
- 43 <sup>21</sup> Sovon Dutch Centre for Field Ornithology, Nijmegen, The Netherlands
- 44 <sup>22</sup> Wetlands International, Ede, The Netherlands
- 45 <sup>23</sup> BirdLife Cyprus, P.O Box 12026 2340, Nicosia, Cyprus
- 46 <sup>24</sup> Monitoring and animal conservation department Schmalgausen Institute of Zoology, NAS of  
47 Ukraine, vul. B. Khmelnytskogo, 15, Kyiv, 01030 Ukraine
- 48 <sup>25</sup> I-WeBS Office, BirdWatch Ireland, Wicklow, Ireland
- 49 <sup>26</sup> Department of Zoology, Estonian University of Life Sciences, Tartu, Estonia
- 50 <sup>27</sup> Department of Vertebrate Ecology and Zoology, Faculty of Biology, University of Gdańsk, Wita  
51 Stwosza 59, 80-308 Gdańsk, Poland
- 52 <sup>28</sup> Croatian Society for Bird and Nature Protection, Zagreb, Croatia
- 53 <sup>29</sup> Sociedad Española de Ornitología (SEO/BirdLife), Madrid, Spain
- 54 <sup>30</sup> Faculty of Environmental Sciences, Czech University of Life Sciences, Praha Suchbát 129, CZ-165  
55 21, Czechia
- 56 <sup>31</sup> National Academy of Science of Belarus, Independence Ave. 66, 220072, Minsk, Republic of  
57 Belarus
- 58 <sup>32</sup> Département Études Aves-Natagora, Namur, Belgium
- 59 <sup>33</sup> Bulgarian Society for the Protection of Birds, PO Box 50, BG-1111 Sofia, Bulgaria.
- 60 <sup>34</sup> Hellenic Ornithological Society, Themistokleous str. 80, 10681, Athens, Greece
- 61 <sup>35</sup> SOS/BirdLife Slovakia, Bratislava, Slovakia
- 62 <sup>36</sup> Bird Protection and Study Society of Serbia, Vladike Ćirića 24/19, 21000 Novi Sad, Srbija  
63 Makedonska 4, 11000 Beograd, Srbija
- 64 <sup>37</sup> Lithuanian Ornithological Society, Naugarduko 47-3, LT-03208 Vilnius, Lithuania
- 65 <sup>38</sup> Institute of Biology, University of Latvia, Salaspils, Latvia
- 66 <sup>39</sup> Swiss Ornithological Institute, Sempach, Switzerland
- 67 <sup>40</sup> BirdLife Österreich, Museumsplatz 1/10/8, 1070 Vienna / Austria
- 68 <sup>41</sup> Nase Ptice Ornithological Society, Sarajevo, Bosnia and Herzegovina

69 <sup>42</sup> Macedonian Ecological Society, Boris Trajkovski st.7 No.9A, Skopje, Macedonia

70 <sup>43</sup> Natural History Museum of Montenegro, Trg Vojvode Bećir-bega Osmanagića 16, Podgorica,

71 Montenegro

72 <sup>44</sup> Dachverband Deutscher Avifaunisten e.V. (DDA), Federation of German Avifaunists, Münster,

73 Germany

74 <sup>45</sup> Istituto Superiore per la Protezione e la Ricerca Ambientale (ISPRA), Ozzano dell'Emilia, Italy

75

76

77 **Corresponding author:** Elie Gaget, University of Turku, Finland. E-mail: [elie.gaget@gmail.com](mailto:elie.gaget@gmail.com)

78 **Running head:** Protected areas and distribution changes

79 **Keywords:** Colonization; Community adjustment; Community Temperature Index; Extinction; Range  
80 shift; Wetlands

81 **Abstract:**

82 Climate warming is driving changes in species distributions, although many species show a so-called  
83 climatic debt, where their range shifts lag behind the fast shift in temperature isoclines. Protected  
84 areas (PAs) may impact the rate of distribution changes both positively and negatively. At the cold  
85 edges of species distributions, PAs can facilitate species distribution changes by increasing the  
86 colonization required for distribution change. At the warm edges, PAs can mitigate the loss of  
87 species, by reducing the local extinction of vulnerable species. To assess the importance of PAs to  
88 affect species distribution change, we evaluated the changes in a non-breeding waterbird  
89 community as a response to temperature increase and PA status, using changes of species  
90 occurrence in the Western-Palearctic over 25 years (97 species, 7,071 sites, 39 countries, 1993–  
91 2017). We used a community temperature index (CTI) framework based on species thermal affinities  
92 to investigate the species turn-over induced by temperature increase. In addition, we measured  
93 whether the thermal community adjustment was led by cold-dwelling species extinction and/or  
94 warm-dwelling species colonization, by modelling the change in standard deviation of the CTI (CTI<sub>sd</sub>).  
95 Using linear mixed-effects models, we investigated whether communities within PAs had lower  
96 climatic debt and different patterns of community change regarding the local PA surface. Thanks to  
97 the combined use of the CTI and CTI<sub>sd</sub>, we found that communities inside PAs had more species,  
98 higher colonization, lower extinction and the climatic debt was 16% lower than outside PAs. The  
99 results suggest the importance of PAs to facilitate warm-dwelling species colonization and attenuate  
100 cold-dwelling species extinction. The community adjustment was however not sufficiently fast to  
101 keep pace with the strong temperature increase in central and northeastern Western-Palearctic  
102 regions. Our study underlines the potential of the combined CTI and CTI<sub>sd</sub> metrics to understand the  
103 colonization-extinction patterns driven by climate warming.

## 104 **Introduction**

105 Global warming is one of the major causes of biological changes among the growing cocktail of  
106 anthropic pressures on the natural world (Monastersky 2014). There are several studies  
107 documenting global species distribution shifts towards the poles (Parmesan & Yohe 2003, Chen et al.  
108 2011) which are driven by colonization at the leading distribution edge and extinction at the trailing  
109 edge (Thomas and Lennon 1999, Franco et al. 2006). However, distribution changes have mostly  
110 been insufficient to track the thermal isocline shifts, leading to climatic 'debt' in species distributions  
111 (Chen et al. 2011, Devictor et al. 2012). Furthermore, the pressures from climate change may be  
112 exacerbated by other factors interacting with colonization and extinction processes (Hill et al. 2001,  
113 Brook et al. 2008), like habitat fragmentation (Opdam and Wascher 2004, Hill et al. 2001) or land-use  
114 change (Auffret and Thomas 2019, Gaget et al. in press). However, some of these interactions may  
115 be positive, for example, protected areas may positively alter species ability to respond to climate  
116 change (Thomas et al. 2012).

117 Protected areas (hereafter, PAs) are expected to facilitate species distribution shifts in response to  
118 climate warming by reducing anthropic pressures on ecosystems (Monzón et al. 2011). PAs are one  
119 of the most efficient solutions to protect ecosystem of high biological importance (Godet and  
120 Devictor 2018). At the leading edge of species distributions, colonization may occur more likely in  
121 PAs (Hiley et al. 2013, Gillingham et al. 2015, Lehikoinen et al. 2019, Peach et al. 2019), particularly  
122 with large PA surface (Gaüzère et al. 2016), promoting range expansion (Thomas et al. 2012, Pavón-  
123 Jordán et al. 2015). Conversely, species extinction at the trailing edge can be reduced within PAs  
124 (Gillingham et al. 2015, Lehikoinen et al. 2019, Peach et al. 2019). In view of these contrasting  
125 patterns, it is important to evaluate in a comprehensive framework the effects of PAs on species  
126 distributions throughout the overall community of species.

127 Temperature driven shifts in species distributions will reshuffle community structure, with  
128 colonization of warm-dwelling species and/or extinction of cold-dwelling species (Devictor et al.

129 2008). Community adjustment to climate warming can be assessed with the intuitive community  
130 temperature index (hereafter, CTI), based on the average species thermal affinities in a community  
131 (Devictor et al. 2008). The CTI allows us to identify how local conditions such as site protection  
132 influence the community adjustment to warming (Gaüzère et al. 2016, Santangeli et al. 2017), and  
133 quantify any delay in tracking climate warming, namely the climatic debt (Devictor et al. 2012). In  
134 addition to the average community response measured with the CTI, the variance of the response  
135 provides a complementary indicator with which to investigate the species colonization-extinction  
136 processes (Fig. 1, Gaüzère et al. 2019).

137 Here, we investigated the community adjustment of non-breeding waterbirds to climate warming  
138 throughout the Western-Palearctic over 25 years and whether the patterns of change differed within  
139 and outside of PAs. This region, extending from the Mediterranean biodiversity hotspot to the Arctic,  
140 faces substantial anthropic pressures (IPCC 2014, IPBES 2018a, 2018b). Despite great conservation  
141 efforts, wetlands in this region have suffered drastic damages (Dixon et al. 2016) and many  
142 waterbird populations have been declining for decades (Gardner & Davidson 2011). Because of this,  
143 waterbirds have been targeted with a large-scale monitoring program, the International Waterbird  
144 Census (IWC, Delany 2010), which provides unique data to investigate the effectiveness of  
145 conservation strategies at continental scale (Pavón-Jordán et al. 2015, Amano et al. 2018). We  
146 expect that in response to climate warming, warm-dwelling waterbirds will colonize more in PAs and  
147 cold-dwelling species may be more resilient within PAs, as they usually contain good quality habitat  
148 (Lawson et al. 2014). Despite numerous studies on waterbird distribution changes in response to  
149 climate warming (e.g. Maclean et al. 2008, Lehikoinen et al. 2013, Pavón-Jordán et al. 2019),  
150 including conservation measures (Johnston et al. 2013, Pavón-Jordán et al. 2015, Gaget et al. 2018,  
151 Marion and Bergerot 2018), assessments of differences in waterbird distribution changes at  
152 community level inside and outside PAs are still lacking.

153 We analyzed an extensive dataset on waterbird occurrence (97 species) across 39 countries (7,071  
 154 sites), within the CTI framework (Devictor et al. 2008) and the related community thermal standard  
 155 deviation (hereafter  $CTI_{sd}$ , Fig. 1) to i) evaluate whether the community adjustment to climate  
 156 warming was higher, and the climatic debt lower, inside PAs, ii) identify whether within PAs there  
 157 are more colonization of warm-dwelling species and fewer extinction of cold-dwelling species, and  
 158 iii) investigate whether the community adjustment to climate warming was improved where local PA  
 159 surface was larger.

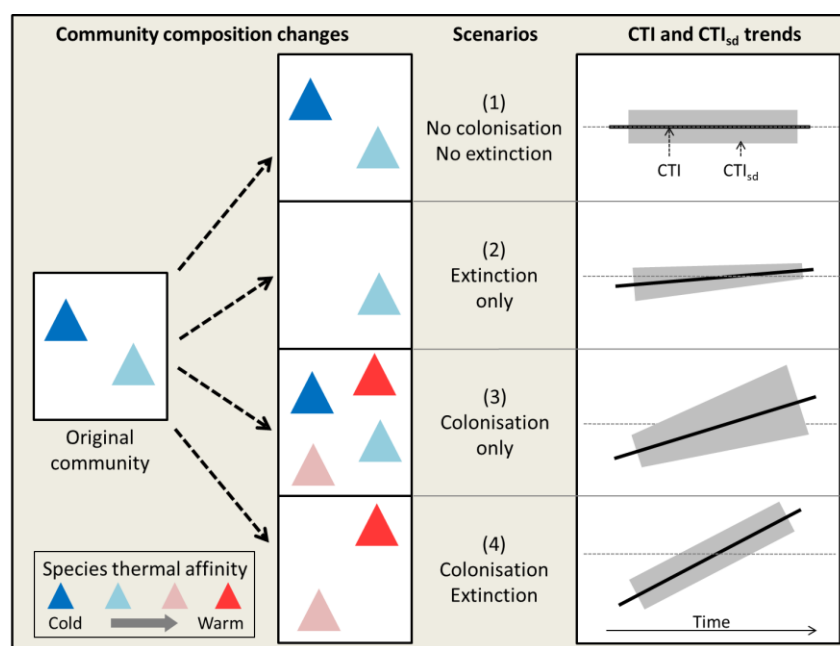

160

161 Figure 1: Schematic models of the four theoretical species colonization and/or extinction scenarios  
 162 depending of their thermal affinities in response to climate warming and subsequent trends of  
 163 community temperature index (CTI, i.e., thermal average) and CTI standard deviation ( $CTI_{sd}$ , i.e.,  
 164 thermal standard deviation) over time (see Gauzere et al. 2019). Species are represented by colored  
 165 triangles: blue to red correspond to cold- and warm-dwelling species, respectively. The different  
 166 scenarios are, (1) 'No colonization-No extinction' causes no CTI and  $CTI_{sd}$  changes; (2) 'Extinction  
 167 only' causes CTI increase and  $CTI_{sd}$  decrease by the loss of cold-dwelling species; (3) 'Colonization  
 168 only' causes CTI and  $CTI_{sd}$  increase by the gain of warm-dwelling species; (4) 'Colonization-Extinction'

169 causes CTI increase by the species thermal turn-over, but no CTI<sub>sd</sub> directional change. The code for  
170 simulations is in Appendix 1.

## 171 **Material and methods**

### 172 **Study area and waterbird monitoring**

173 We used International Waterbird Census (IWC) data from almost all of the Western-Palearctic (39  
174 countries, Fig. 2, Appendix 2) from 1993–2017. The IWC monitors non-breeding waterbirds with a  
175 single count each year by ornithologists, professional or citizen scientists, in January and is  
176 coordinated by Wetlands International ([www.wetlands.org](http://www.wetlands.org), see Delany (2010) for the protocol). To  
177 ensure a long-term survey of community changes, we filtered the original data down to information  
178 from the 7,071 sites included in the study (Fig. 2) that each have at least five counts, with one count  
179 in each decade (1990s, 2000s and 2010s;  $16.6 \pm 5.6$  counts per site) and at least two species per  
180 count ( $n = 117,325$  counting events, Appendix 2). We included the 97 non-vagrant waterbird species  
181 overwintering in the Western-Palearctic (Appendix 3) listed in the African-Eurasian Migratory  
182 Waterbird Agreement (AEWA, <http://www.unep-aewa.org>).

183

### 184 **Protected areas and temperature data**

185 Site protection was reported for 3,374 sites from the World Database on Protected Areas (IUCN,  
186 UNEP-WCMC 2019), the Natura 2000 and the CDDA databases ([www.eea.europa.eu](http://www.eea.europa.eu)) (Fig. 2). Sites  
187 were considered as protected when their coordinates were included in the polygon of a protected  
188 area designated before 2017. When polygon data were absent (12% of the cases), a circular buffer  
189 was created based on the PA size reported in the World Database on Protected Areas (note that  
190 100% concordance of site protection status was found by creating a circular area on the subset of  
191 PAs with polygons). The sites inside ( $n = 3,374$ ) and outside ( $n = 3,697$ ) PAs had a similar number of



192 counts (in average ( $\pm$ SD)  $16.8\pm 5.7$  and  $16.4\pm 5.7$ , respectively) and a similar spatial distribution (in  
193 average ( $\pm$ SD) Lat.  $49.8\pm 6.2$ , Lon.  $7.0\pm 9.1$  and Lat.  $50.3\pm 6.1$ , Lon.  $5.2\pm 9.0$ , respectively, Fig. 2).  
194 The HadCRUT4 dataset (Morice et al. 2012) that has a spatial resolution of  $0.5^\circ$  was our source of  
195 temperature data. Yearly winter temperatures were computed each winter as the average of the  
196 mean monthly temperatures of November, December and January.

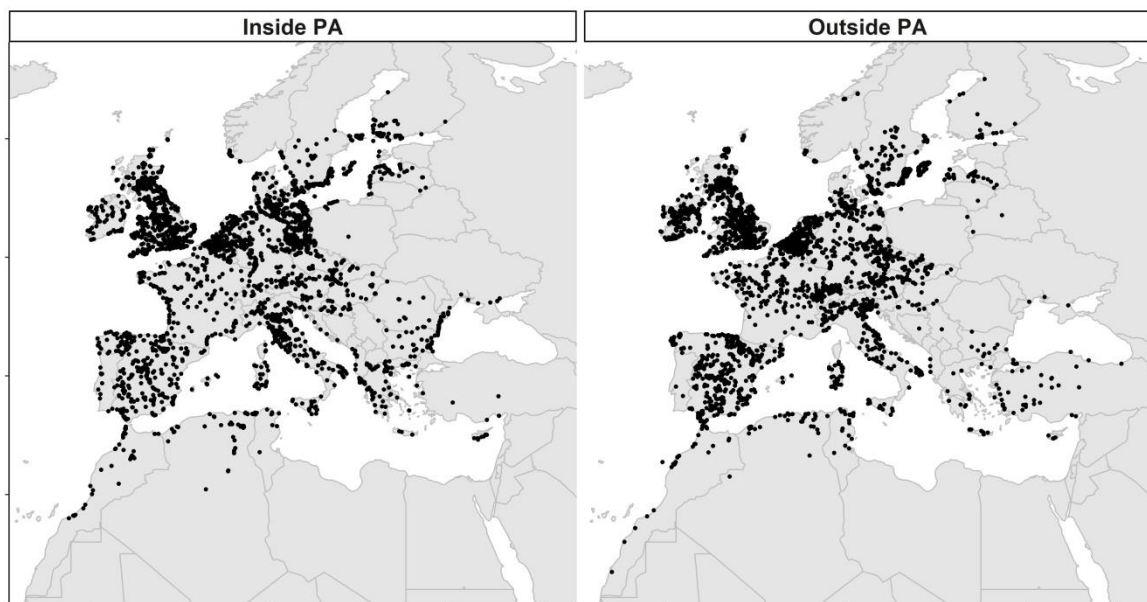

197

198 Figure 2: Map of the study area including 7,071 monitoring sites inside a protected area (PA, n =  
199 3,374) and outside (n = 3,697), in 39 Western-Palearctic countries.

200

## 201 **Community temperature indices**

202 Winter species temperature indices (STI) were computed as the species thermal affinity across the  
203 non-breeding species distribution following Gaget et al. (2018) (adapted for non-breeding waterbirds  
204 from Devictor et al. (2008)). The winter STI is the long-term average January temperature  
205 (WorldClim database, 1950-2000, <http://worldclim.org/>) experienced by the species across the non-  
206 breeding (overwintering) distribution (extracted from [www.birdlife.org](http://www.birdlife.org) 2015). Sub-species with

207 distributions in Sub-Saharan African were removed to avoid an overestimation of the temperature  
208 experienced by the studied populations (Appendix 3).

209 The CTI and CTI standard deviation ( $CTI_{sd}$ ) were computed following Devictor et al. (2008) and  
210 Gaüzère et al. 2019 on species occurrence (presence/absence). The CTI is the average STI of the  
211 species present in the community per count event (see Appendix 4). The  $CTI_{sd}$  is the standard  
212 deviation of the species STI present in the community per count event, quantifying the STI  
213 heterogeneity in the community. Thus, the CTI increases over the years when there are more warm-  
214 dwelling species or fewer cold-dwelling species. The  $CTI_{sd}$  increases over the years when the thermal  
215 affinities of the community become more heterogeneous (Fig. 1). Occurrence data were used  
216 instead of abundance data to make it easier to interpret the processes of colonization-extinction,  
217 but usually produce similar CTI trends (e.g. Devictor et al. 2008, Gaget et al. 2018).

218

## 219 **Data analysis**

### 220 *Protected areas, CTI, $CTI_{sd}$ and climatic debt*

221 Temporal changes of temperature, CTI and  $CTI_{sd}$  depending of the PA status were assessed with  
222 generalized linear mixed effects models (GLMM, Gaussian error distribution). The explanatory terms  
223 were the *year* (continuous variable from 1993-2017), the site *protection status* (Inside or Outside)  
224 and the interaction *year*  $\times$  *protected status*. The *site identity* was added as a random effect on the  
225 intercept in the CTI and  $CTI_{sd}$  models. The spatial autocorrelation was taken into account by including  
226 the site geographical coordinates as an exponential spatial correlation structure in the model (Gaget  
227 et al. 2018). The linear model was:

$$228 \quad T_{i,j} \sim \mu + year_i \times PA_j + site_j + \varepsilon_{i,j}$$

229 where  $T_{ij}$  was the temperature, CTI, or  $CTI_{sd}$ , in year  $i$  at site  $j$ ,  $\mu$  was the intercept, PA was the site  
230 protection status of site  $j$ ,  $\eta_j$  was the random intercept per site that follows a Gaussian distribution  
231 with mean of zero and variance  $\sigma^2$ , and  $\epsilon$  was the residual variance for each observation under a  
232 Gaussian distribution and an exponential spatial correlation. In order to visually assess whether it  
233 was appropriate to model inter-annual changes as a linear effect, we generated and plotted mean  
234 annual values ( $\pm$  95% CI) by using the same model, but changing year to a categorical variable.

235 We looked for evidence of climatic debt accumulated by the waterbird communities by assessing the  
236 difference between the linear trends of temperature and CTI, following Devictor et al. (2008). First  
237 we investigated the latitudinal gradients in temperature and CTI with a GLMM (Gaussian error  
238 distribution), using the latitude as a fixed effect. The latitudinal gradient was converted to kilometres  
239 by dividing it by 111.128, i.e., the average number of kilometres per 1 decimal degree temperature  
240 over the whole study area. Then the temporal temperature change ( $^{\circ}\text{C yr}^{-1}$ ) was converted to a  
241 velocity of temperature change in kilometres ( $\text{km yr}^{-1}$ ) by using the latitudinal temperature gradient  
242 ( $^{\circ}\text{C km}^{-1}$ ) from South to North of the study area. The same was done with the CTI. Lastly, the climatic  
243 debt was obtained by subtracting the velocity of the CTI change from the velocity of the  
244 temperature change over the study period.

245 In addition, we assessed the temporal trend of cold- and warm-dwelling species inside vs. outside  
246 PAs. Species were classified in two categories as 'cold-dwelling' or 'warm-dwelling' following their  
247 STI in relation to the individual site, i.e., cooler or warmer than the mean CTI of the site's time series,  
248 respectively. Then, the number of cold and warm-species was summed per survey. We used these  
249 two simplified categories to control the accuracy of the community thermal changes assessed with  
250 CTI and  $CTI_{sd}$ . The temporal changes in number of cold- and warm-dwelling species were assessed  
251 using in a GLMM (Poisson error distribution) with fixed effects of year, the thermal-dwelling  
252 category (cold or warm), the site PA status (Inside or Outside) and their three-way interactions. The  
253 site identity was added as a random factor. The spatial autocorrelation was taken into account by

254 including the site geographical coordinates as an exponential spatial correlation structure in the  
255 model.

256

### 257 *Community changes in response to protected area surface*

258 We investigated whether the local CTI, climatic debt and CTI<sub>sd</sub> trends were correlated with the local  
259 PA surface. First, a moving-window approach was used to investigate the spatio-temporal changes of  
260 temperature, CTI, climatic debt and CTI<sub>sd</sub>. The study area was divided in 1,032 cells of 5°×5°  
261 resolution (c. 500x500 km) spaced from each other by one latitudinal or longitudinal degree. We  
262 performed one GLMM per cell per response variable (temperature, CTI and CTI<sub>sd</sub>), to investigated  
263 their change over years using the same model structure as before. Temperature, CTI and climatic  
264 debt spatio-temporal changes were given in km yr<sup>-1</sup>, and in °C yr<sup>-1</sup> for the CTI<sub>sd</sub>. Note that each cell  
265 included both protected and not protected sites and at least 15 sites (mean of 175 sites), to avoid  
266 cells with a small number of sites at the edge of the study area.

267 Then, we investigated the relationship between the PA surface per cell and the CTI spatial shift, CTI<sub>sd</sub>  
268 and climatic debt trends, estimated from the models above. One generalised linear model (GLM,  
269 Gaussian error distribution) was used per response variable with fixed effects the PA surface (sum of  
270 the PA surfaces per cell, log transformation assuming a non-linear relation) and the temperature  
271 spatial shift plus their interaction to control for the climate warming pressure. To investigate the  
272 geographical PA surface repartition in the Western-Palearctic, we also assessed in a GLM whether PA  
273 surface increased with latitude, longitude and their interaction.

274 All the statistical analyses were performed with R 3.4.3 (R Core Team 2017), using the 'glmmTMB'  
275 package (Magnusson et al. 2017) for the GLMM and GLM.

276

277 **Results**

278 *Protected areas, CTI, CTI<sub>sd</sub> and climatic debt*

279 The temperature increased by 0.04°C per year ( $P < 0.001$ ) without significant difference between  
280 inside and outside PA ( $P = 0.2$ , Table 1, Fig. 3a). The CTI increased faster inside PAs than outside,  
281 about 0.010°C yr<sup>-1</sup> to 0.006°C yr<sup>-1</sup>, respectively (Table 1, Fig. 3c). CTI<sub>sd</sub> increase was significant inside  
282 PAs, but not significant outside PAs (Table 1, Fig. 3d). Therefore, within PAs, the results matched  
283 scenario 3 (Fig. 1; colonization only), whereas outside PAs the results matched scenario 4 (Fig. 1;  
284 colonization and extinction).

285 Temporal changes in CTI lagged behind changes in temperature. The temperature latitudinal  
286 gradient was about -0.38°C per decimal degree (SE = 0.005,  $Z = -78.75$ ,  $P < 0.001$ ) and -0.31°C (SE =  
287 0.004,  $Z = -69.56$ ,  $P < 0.001$ ) for the CTI. The temperature increase was equivalent to a latitudinal  
288 shift of 11.4 km yr<sup>-1</sup> (285 km in 25 years). The temporal CTI trend was equivalent to a shift 43% larger  
289 inside PAs than outside, with about 3.5 km yr<sup>-1</sup> inside the PAs (87 km over 25 years) and 2.0 km yr<sup>-1</sup>  
290 outside (50 km over 25 years). Consequently, the climatic debt was about 7.9 km yr<sup>-1</sup> inside the PAs  
291 and 9.4 km yr<sup>-1</sup> outside (198 km and 235 km over 25 years, respectively).

292 The number of cold- and warm-dwelling species both increased significantly over the study period,  
293 but the trends and average numbers of species were significantly greater inside PAs (Table 1, Fig.  
294 3b). Warm-dwelling species were more numerous and their number increased faster than the cold-  
295 dwelling species (Table 1). Inside PAs, the warm-dwelling species increased also faster than the cold-  
296 dwelling species (Table 1). This suggests that, both inside and outside PAs fit between scenarios 3  
297 and 4 – with more colonization than extinction.

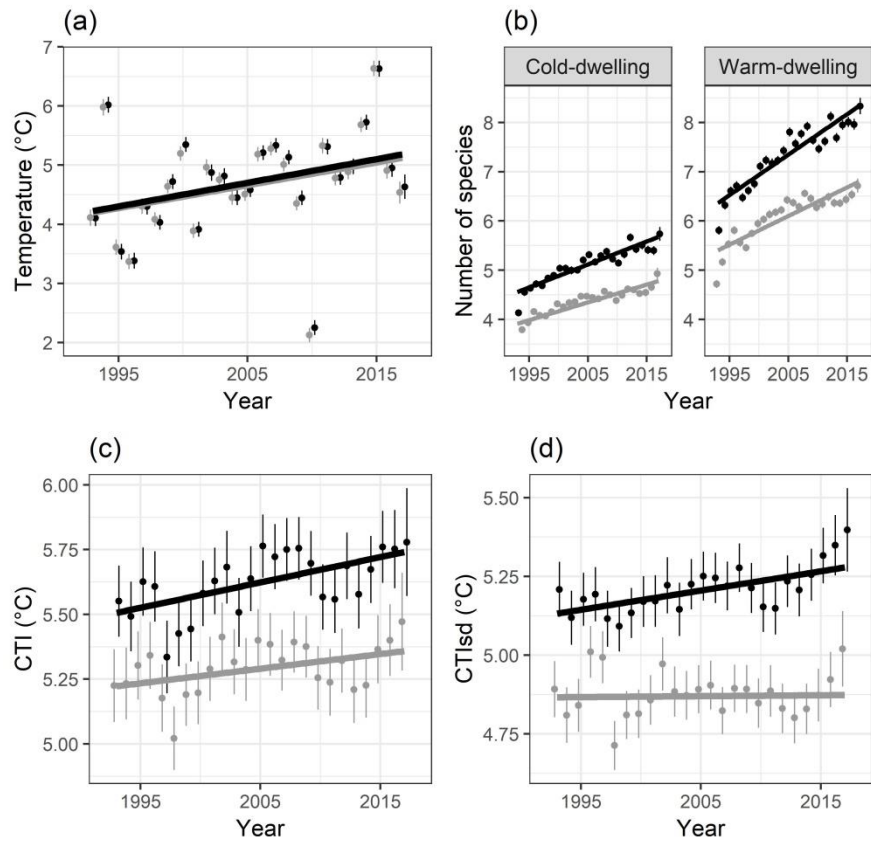

298

299

300 Figure 3: Temporal trends inside PA (black) and outside PA (grey) of the (a) temperature, (b) number  
 301 of cold- and warm-dwelling species, (c) community temperature index (CTI) and (d) standard  
 302 deviation of the CTI (CTI<sub>sd</sub>). Mean ( $\pm$  95% CI) are represented by points.

303 Table 1: Temporal trends of the temperatures, community temperature index (CTI) and standard  
 304 deviation of the CTI (CTI<sub>sd</sub>) and number of cold- and warm-dwelling species regarding the protected  
 305 area (PA) site status. Base line is sites outside PA and cold-dwelling species. Years were standardized  
 306 to zero mean (std.) in the thermal-dwellers model and interactions are notified by ‘:’.

| Variable          | Parameter | Coefficient | SE    | Z-value | P-value |
|-------------------|-----------|-------------|-------|---------|---------|
| Temperature       | Intercept | -72.660     | 1.364 | -53.290 | < 0.001 |
|                   | Year      | 0.039       | 0.001 | 56.750  | < 0.001 |
|                   | PA        | 2.704       | 1.957 | 1.380   | 0.167   |
|                   | Year:PA   | 0.001       | 0.001 | 1.400   | 0.160   |
| CTI               | Intercept | -6.030      | 1.696 | -3.554  | < 0.001 |
|                   | Year      | 0.006       | 0.001 | 6.676   | < 0.001 |
|                   | PA        | 7.972       | 2.435 | 3.274   | < 0.001 |
|                   | Year:PA   | 0.004       | 0.001 | 3.412   | < 0.001 |
| CTI <sub>sd</sub> | Intercept | 4.294       | 1.602 | 2.680   | 0.007   |
|                   | Year      | 0.000       | 0.001 | 0.360   | 0.719   |
|                   | PA        | 11.310      | 2.300 | 4.920   | < 0.001 |

|                         |                       |       |       |         |         |
|-------------------------|-----------------------|-------|-------|---------|---------|
|                         | Year:PA               | 0.006 | 0.001 | 5.066   | < 0.001 |
|                         | Intercept             | 1.466 | 0.012 | 125.070 | < 0.001 |
|                         | Year(std.)            | 0.057 | 0.002 | 33.560  | < 0.001 |
|                         | PA                    | 0.163 | 0.017 | 9.600   | < 0.001 |
| Cold- and warm-dwellers | Dweller               | 0.338 | 0.002 | 154.600 | < 0.001 |
|                         | Year(std.):PA         | 0.005 | 0.002 | 2.360   | 0.018   |
|                         | Year(std.):Dweller    | 0.008 | 0.002 | 3.820   | < 0.001 |
|                         | PA:Dwellers           | 0.022 | 0.003 | 7.360   | < 0.001 |
|                         | Year(std.):PA:Dweller | 0.006 | 0.003 | 1.960   | 0.049   |

307

308

309 *Community changes in response to protected area surface*

310 The temperature increased significantly in 80% of the study area, with the exception of the northern  
 311 half of the Iberian Peninsula (Fig. 4A). The CTI significantly increased in 37% of the cells (384/1,032),  
 312 mostly from South Balkans to West France and around the Baltic Sea (Fig. 4B). Consequently, there  
 313 was climatic debt in 66% of the area, mostly in the northern half of Europe (Fig. 4C). Lastly, the CTI<sub>sd</sub>  
 314 trend was significantly positive in 39% of the cells, mainly in the East and the South, but also around  
 315 the Baltic Sea (Fig. 4D).

316 The CTI spatial shift increased with PA surface and temperature spatial shift ( $P \leq 0.001$ ) but without a  
 317 significant interaction (Table 2). Consequently, the climatic debts accumulated were smaller where  
 318 there was more PA surface and greater where the temperature spatial shift was faster ( $P \leq 0.001$ )  
 319 (Table 2). The temporal CTI<sub>sd</sub> trends did not change with PA surface ( $P = 0.3$ ), but increased less  
 320 where the temperature spatial shift was faster ( $P < 0.001$ , Table 2). However, the CTI<sub>sd</sub> trends  
 321 decreased when both PA surface and temperature spatial shift increased as demonstrated by a  
 322 negative interaction between temperature spatial shift and PA surface (Table 2). The PA surface  
 323 areas were greater in southwest and northeast, as the PA surface decreased with the longitude ( $\beta = -$   
 324  $0.266$ ,  $P < 0.001$ ) but not with the latitude ( $\beta = -0.067$ ,  $P < 0.14$ ), with a positive and significant  
 325 interaction ( $\beta = 0.274$ ,  $P < 0.001$ , Appendix 5).



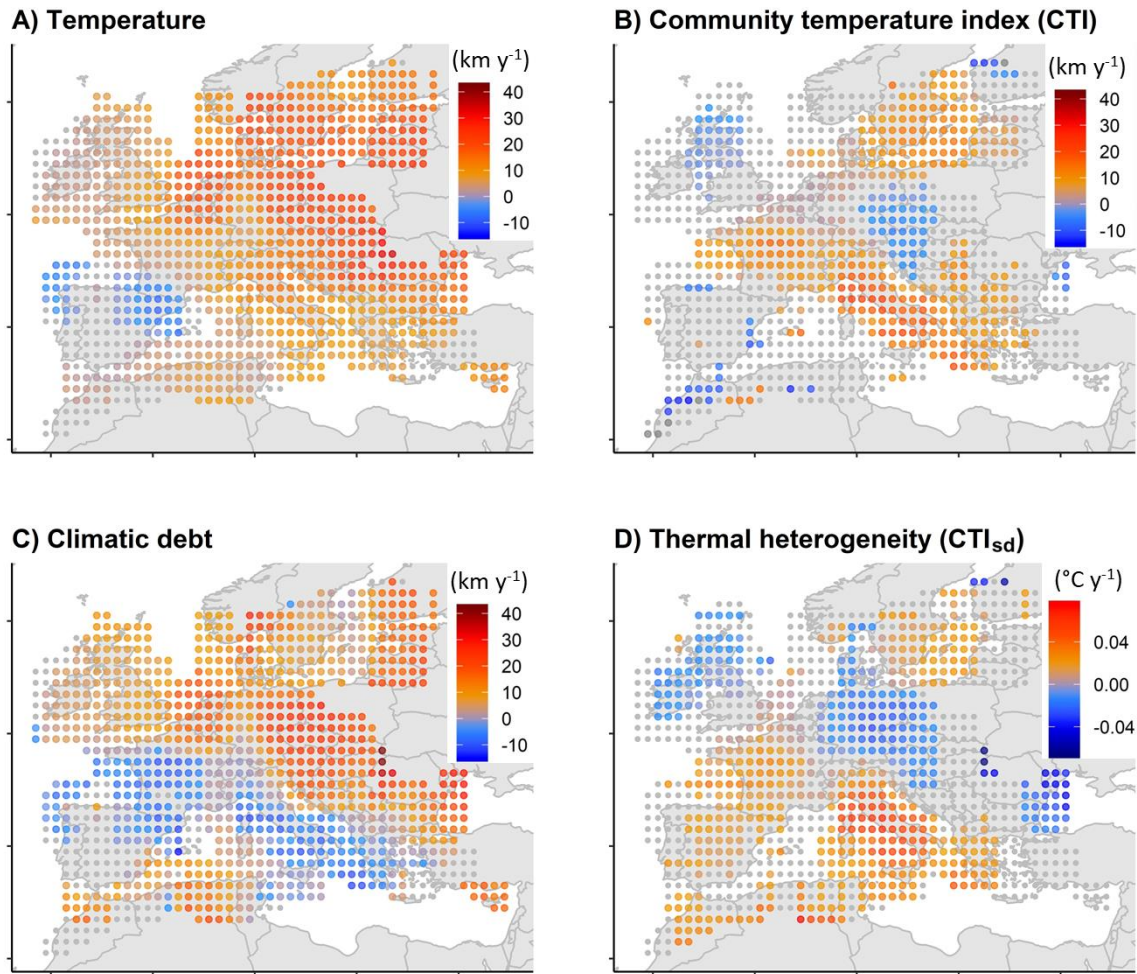

326

327 Figure 4: Spatio-temporal trends from 1993-2017 of (A) temperature, (B) community temperature  
 328 index CTI, (C) climatic debt and (D) thermal heterogeneity  $CTI_{sd}$ . Trends are represented by points  
 329 located at the centre of the corresponding cell ( $5^{\circ} \times 5^{\circ}$  resolution). Coloured points denote a  
 330 significant trend ( $P < 0.05$ , positive 'red', negative 'blue') while colour gradient indicates the trend  
 331 intensity (not significant trend in grey).

332

333 Table 2: Spatial effect of protected area surface (log transformed) and interaction with the  
 334 temperature spatial shift on the CTI spatial shift, climatic debt and  $CTI_{sd}$ , per cell of  $5^{\circ} \times 5^{\circ}$ . Interacting  
 335 effects denoted by '·'.

| Variable          | Parameter                 | Coefficient | SE    | Z-value | P-value |
|-------------------|---------------------------|-------------|-------|---------|---------|
| CTI spatial shift | Intercept                 | 3.086       | 0.203 | 15.220  | < 0.001 |
|                   | PA surface                | 0.666       | 0.204 | 3.268   | 0.001   |
|                   | Temperature spatial shift | 1.074       | 0.205 | 5.252   | < 0.001 |



|                   |                                        |         |       |        |         |
|-------------------|----------------------------------------|---------|-------|--------|---------|
|                   | PA surface : Temperature spatial shift | 0.130   | 0.250 | 0.517  | 0.605   |
| Climatic debt     | Intercept                              | 168.688 | 5.069 | 33.280 | < 0.001 |
|                   | PA surface                             | -16.658 | 5.094 | -3.270 | 0.001   |
|                   | Temperature spatial shift              | 167.104 | 5.112 | 32.690 | < 0.001 |
|                   | PA surface : Temperature spatial shift | -3.233  | 6.256 | -0.520 | 0.605   |
| CTI <sub>sd</sub> | Intercept                              | 0.007   | 0.001 | 13.220 | < 0.001 |
|                   | PA surface                             | 0.001   | 0.001 | 1.111  | 0.267   |
|                   | Temperature spatial shift              | -0.005  | 0.001 | -9.822 | < 0.001 |
|                   | PA surface : Temperature spatial shift | -0.002  | 0.001 | -2.799 | 0.005   |

336

337

## 338 Discussion

339 *Community adjusts faster to climate warming inside protected areas*

340 This study represents one of the first empirical and international assessments addressing difference  
 341 in community changes in response to climate warming within PAs on a continental scale. We found  
 342 that the CTI faster increase inside PAs compared to outside areas was driven mainly by colonization  
 343 from warm-dwelling species, which is consistent with other studies on birds and other taxonomic  
 344 groups (Thomas et al. 2012, Gillingham et al. 2015). Indeed, when looking at finer spatial scale, the  
 345 CTI increase was more positive where PA surfaces were larger, suggesting a positive relationship of  
 346 PA coverage on community thermal changes (Gaüzère et al. 2016).

347 Overall, we find that non-breeding waterbirds in the Western-Palearctic show a climatic debt, but  
 348 this debt is 16% lower inside PAs. Communities inside PAs had higher colonization, lower extinction  
 349 and lower climatic debt. Moreover, PAs supported higher waterbird species richness, which is  
 350 consistent with the PA designation on wetlands of high biological importance, e.g. by the Ramsar  
 351 Convention and the European Union's Nature Directives. Therefore PAs are not only important to  
 352 reduce the direct anthropic pressures (Godet & Devictor 2018) but also are associated with reduced

353 climatic debt. Such conservation benefit was expected by international conservation policies  
354 (Trouwborst 2009, 2011, 2012), which use PAs and species protection status as the main  
355 conservation measures to buffer the negative impacts of climate change, in order to reduce  
356 ecosystem pressures and promote species adaptation to climate change (Trouwborst 2011, 2012).  
357 The Western-Palearctic falls under several of these international conventions, such as the Ramsar,  
358 Bern and Bonn Conventions, and the benefits provided by habitat and species protection (Gamero et  
359 al. 2017, Pavón-Jordán in Rev.) seem effective to facilitate the species adjustment to climate  
360 warming (Gaget et al. 2018). For example, both the Great Cormorant (*Phalacrocorax carbo*) and the  
361 Great Egret (*Ardea alba*) had declining populations in Europe until their designation as protected  
362 species by the Bern Convention (19.IX.1979) and the Birds Directive (79/409/EEC) in 1979. After that,  
363 a fast population recovery occurred notably by a northward expansion (Hiley et al. 2013, Ławicki  
364 2014, Marion & Bergerot 2018).

365 Species richness of non-breeding waterbird increased over the study area, particularly inside PAs, in  
366 line with recent general positive trends of Western-Palearctic waterbird populations (Amano et al.  
367 2018). Furthermore, inside – but not outside – PAs the variation in CTI (CTI<sub>sd</sub>) increased over time,  
368 and we find a general increase in CTI of both cold- and warm-dwelling species over time. These  
369 findings suggest that inside PAs, species with high thermal affinity colonized the community, but at  
370 the same time species with low thermal affinity were less likely to be locally extinct. In other words,  
371 PAs can act as refuge by improving species resilience against climate warming (Santangeli et al. 2017,  
372 Berteaux et al. 2018), likely by ensuring ecological requirements needed for species persistence  
373 despite the proximity with the thermal niche edge.

374

375 *Heterogeneity of temperature and community changes*

376 The intensity of the winter temperature warming increased over a southwest-northeast gradient,  
377 driving the community adjustment through a similar gradient of intensity, although not perfectly  
378 (Fig. 4). The thermal isocline shift towards the northeast is related to the continental shape and the  
379 oceanic influence of the Gulf Stream (IPCC 2014). Interestingly, the non-significant temperature and  
380 CTI trends in the southwest of the Western-Palearctic resulted in negligible climatic debts.  
381 Conversely, the climatic debt increased in the northeastern countries where strong temperature  
382 warming occurred (Fig. 4), which non-breeding waterbirds were not able to fully track.

383 Temperature was likely not the only aspect of the physical environment that constrained species'  
384 distributions. The local pattern of CTI changes contrasted with the expected relative increase of  
385 warm-dwelling species. While several other factors are likely to have affected species' distributions,  
386 the CTI focuses on species assemblage changes in response to temperature changes, but its trend  
387 can also be affected by other drivers of population change (Bowler & Böhning-Gaese 2017). For  
388 example, in the UK, despite a species-specific west-east waterbird redistribution (Austin & Rehfisch  
389 2005), the CTI changes were likely altered by the recent increase of geese and the decrease of  
390 waders (Frost et al. 2019), which have low and high STIs, respectively (Appendix 3). Consequently,  
391 the subsequent community reshuffling may jeopardize the detection of a community thermal  
392 adjustment, if it exists (Bowler & Böhning-Gaese 2017). Similarly, the absence of CTI increase in  
393 Central Europe and in the Netherlands despite the temperature increase should encourage species-  
394 specific investigations (e.g. Pavón-Jordán et al. 2015). Such unexpected population changes, under  
395 the hypothesis of a community adjustment to climate warming, increase the theoretical mismatch  
396 between community and temperature changes (Kerbiriou et al. 2009, Galewski and Devictor 2016).

397 Although milder climate conditions reduce ice and snow in the northern regions and enhance  
398 northward range expansion (Brommer 2008, Schummer et al. 2010), the community adjustment to  
399 climate warming was not particularly strong in northern Europe (Fig. 4). This may be the result of  
400 average temperatures not accurately reflecting the thermal conditions that affect species'

401 distribution. For example, in the northern regions, severe cold spells may cause potential large  
402 mortality, this limiting species distribution changes (Gunnarsson et al. 2012).

403 Considering the strong waterbird distribution change in northern Europe (Brommer 2008,  
404 Lehtikoinen et al. 2013), the lack of CTI increase also suggests some limits of the CTI framework. The  
405 CTI measures changes of species assemblages (Devictor et al. 2008) and could be sensitive to the  
406 number of species already present in the community. Indeed, when there are few species at the  
407 beginning of the monitoring, because of ice cover for example, the CTI trend should be more  
408 sensitive to the species arrivals. We acknowledge that we didn't take into account for this potential  
409 uncertainty. Consequently, our ability to measure species distribution change is challenged in these  
410 ice-dominated regions, where the community adjustment to climate warming is likely  
411 underestimated (Fox et al. 2019).

412

#### 413 *Perspectives for research and conservation*

414 Indicators are essential tools to synthesize population dynamics and inform public policies (Tittensor  
415 et al. 2014). The CTI is an intuitive indicator with which to measure and communicate the impact of  
416 climate warming on communities (Devictor et al. 2012, Gaüzère et al. 2019). Here, we go one step  
417 further and used the  $CTI_{sd}$  to identify the colonization-extinction patterns in response to climate  
418 warming (see also Appendix 1). With these simple indicators, we identified that the community  
419 adjustment to temperature was mainly due to colonization by the warm-dwelling species inside PAs,  
420 while outside PAs the extinction of the most cold-dwelling species was nearly equivalent to the  
421 colonization by warm-dwelling species (Fig. 3d).

422 This study relied on an international coordinated monitoring program, allowing us to investigate  
423 whether community adjustment to climate warming was higher in PAs. The IWC is a monitoring  
424 scheme that aims to ensure waterbird counts (full check-lists) in both protected and unprotected

425 areas (Delany 2010). However, we acknowledge that PAs were not randomly distributed (Fig. 2), and  
426 that such non-randomness could induce spatial aggregation between PA density and CTI changes.  
427 Nevertheless, when looking at the spatio-temporal changes (Fig. 4), spatial aggregation was  
428 moderate. In particular, the CTI trends were heterogeneous even between areas with high PA  
429 density (Fig. 2), e.g. in the Netherlands or southern UK. More emphasis should be given to  
430 investigate how PA characteristics, e.g. management plans, influence at a local scale community  
431 adjustment to climate warming (Monzón et al. 2011).

432 Non-breeding waterbirds have high capacity to respond to climate warming by a distribution change  
433 (Maclean et al. 2008, Lehikoinen et al. 2013, Pavón-Jordán et al. 2019) even more than other groups  
434 of birds (Brommer 2008). Our study reveals a faster average distribution shift, 2.0 to 3.5 km yr<sup>-1</sup>, in  
435 comparison to the European common breeding birds (2.1 km yr<sup>-1</sup>, Devictor et al. 2012) and other  
436 taxa (1.8 km yr<sup>-1</sup>, Chen et al. 2011). Indeed, most of the Western-Palearctic waterbirds are migratory,  
437 spending energy and facing multiple threats during migration. Shortening their migration routes, by  
438 overwintering at more northern latitudes, could be advantageous, by decreasing the migration cost  
439 and benefits their fitness (Gilroy 2017, Reneerkens et al. 2019).

440 These rapid distributional changes that we found bring into question the future effectiveness of the  
441 PA networks, because of the locations of these sites potentially do not match the future  
442 distributions of waterbird species (Araújo et al. 2004). In the Western-Palearctic, the PA network  
443 covers 45% of the inland wetlands (Bastin et al. 2019) and even if the number of PAs increases in the  
444 northeast, the network still does not cover all the wetlands important for waterbird conservation  
445 (Pavón-Jordán et al. 2015, Pavón-Jordán in Rev.). In the future, PAs can maintain their conservation  
446 value if the extinction of conservation concern species is compensated by the colonization of other  
447 species of conservation concern (Hole et al. 2009, Johnston et al. 2013). From that perspective, our  
448 results are encouraging, as they indicate the PAs would still remain important for waterbird  
449 conservation in the future, since waterbird colonization was greater, and extinction lower, inside a

450 PA compared to outside. However, more studies are needed to understand the mechanisms by  
451 which PAs have buffered against climate change, and to evaluate the current and future  
452 completeness of the PA network particularly for conservation concern species (Pavón-Jordán et al.  
453 2015).

## 454 Acknowledgements

455 We acknowledge the thousands of volunteers and professionals involved in the International  
456 Waterbird Census, making this research possible. This research was funded through the 2017-2018  
457 Belmont Forum and BiodivERsA joint call for research proposals, under the BiodivScen ERA-Net  
458 COFUND programme, with the following funding organizations: the Academy of Finland (Univ. Turku:  
459 326327, Univ. Helsinki: 326338), the Swedish Research Council (Swedish Univ. Agric. Sci: 2018-  
460 02440, Lund Univ.: 2018-02441), the Research Council of Norway (Norwegian Instit. for Nature Res.,  
461 295767), the National Science Foundation (Cornell Univ., ICER-1927646) and we also acknowledge  
462 the Swedish Environmental Protection Agency.

463

## 464 References

- 465 Amano, T., et. al. (2018). Successful conservation of global waterbird populations depends on  
466 effective governance. *Nature*, 553(7687), 199.
- 467 Araújo, M. B., Cabeza, M., Thuiller, W., Hannah, L., & Williams, P. H. (2004). Would climate change  
468 drive species out of reserves? An assessment of existing reserve-selection methods. *Global change*  
469 *biology*, 10(9), 1618-1626.
- 470 Auffret, A. G., & Thomas, C. D. (2019). Synergistic and antagonistic effects of land use and non-native  
471 species on community responses to climate change. *Global change biology*.
- 472 Austin, G. E., & Rehfisch, M. M. (2005). Shifting nonbreeding distributions of migratory fauna in  
473 relation to climatic change. *Global Change Biology*, 11(1), 31-38.
- 474 Bastin, L., Gorelick, N., Saura, S., Bertzky, B., Dubois, G., Fortin, M. J., & Pekel, J. F. (2019). Inland  
475 surface waters in protected areas globally: Current coverage and 30-year trends. *PloS one*, 14(1),  
476 e0210496.
- 477 Berteaux, D., Ricard, M., St-Laurent, M. H., Casajus, N., Périé, C., Beauregard, F., & de Blois, S. (2018).  
478 Northern protected areas will become important refuges for biodiversity tracking suitable climates.  
479 *Scientific reports*, 8(1), 4623.
- 480 BirdLife International and Handbook of the Birds of the World (2018) Bird species distribution maps  
481 of the world. Version 2018.1. Available at <http://datazone.birdlife.org/species/requestdis>
- 482 Bowler, D., & Böhning-Gaese, K. (2017). Improving the community-temperature index as a climate  
483 change indicator. *PloS one*, 12(9), e0184275.
- 484 Brommer, J. E. (2008). Extent of recent polewards range margin shifts in Finnish birds depends on  
485 their body mass and feeding ecology. *Ornis Fennica*, 85(4), 109-17.
- 486 Brook, B. W., Sodhi, N. S., & Bradshaw, C. J. (2008). Synergies among extinction drivers under global  
487 change. *Trends in ecology & evolution*, 23(8), 453-460.
- 488 Chen, I. C., Hill, J. K., Ohlemüller, R., Roy, D. B., & Thomas, C. D. (2011). Rapid range shifts of species  
489 associated with high levels of climate warming. *Science*, 333(6045), 1024-1026.
- 490 Delany S. 2010. Guidance on Waterbird Monitoring Methodology: Field Protocol for Waterbird  
491 Counting (Wetlands International).

- 492 Devictor, V., Julliard, R., Couvet, D., & Jiguet, F. (2008). Birds are tracking climate warming, but not  
493 fast enough. *Proceedings of the Royal Society B: Biological Sciences*, 275(1652), 2743-2748.
- 494 Devictor, V., et. al. (2012). Differences in the climatic debts of birds and butterflies at a continental  
495 scale. *Nature climate change*, 2(2), 121.
- 496 Dixon, M. J. R., Loh, J., Davidson, N. C., Beltrame, C., Freeman, R., & Walpole, M. (2016). Tracking  
497 global change in ecosystem area: the Wetland Extent Trends index. *Biological Conservation*, 193, 27-  
498 35.
- 499 Finlayson, C. M., et al. (2017). Policy considerations for managing wetlands under a changing  
500 climate. *Marine and Freshwater Research*, 68(10), 1803-1815.
- 501 Fox, A. D., Nielsen, R. D., & Petersen, I. K. (2019). Climate-change not only threatens bird populations  
502 but also challenges our ability to monitor them. *Ibis*, 161(2), 467-474.
- 503 Franco, A. M., et. al. (2006). Impacts of climate warming and habitat loss on extinctions at species'  
504 low-latitude range boundaries. *Global Change Biology*, 12(8), 1545-1553.
- 505 Frost, T. et al. (2019). Population estimates of wintering waterbirds in Great Britain. *British Birds*,  
506 112, 130-145.
- 507 Gaget, E., Galewski, T., Jiguet, F., Guelmami, A., Perennou, C., Beltrame, C. & Le Viol I. (2019)  
508 Antagonistic effect of natural habitat conversion on community adjustment to climate warming in  
509 non-breeding waterbirds. *Conservation Biology*, in press, DOI: 10.1111/cobi.13453
- 510 Gaget, E., Galewski, T., Jiguet, F., & Le Viol, I. (2018). Waterbird communities adjust to climate  
511 warming according to conservation policy and species protection status. *Biological conservation*,  
512 227, 205-212.
- 513 Galewski T, Devictor V (2016) When Common Birds Became Rare: Historical Records Shed Light on  
514 Long-Term Responses of Bird Communities to Global Change in the Largest Wetland of France. *PLOS*  
515 *ONE*, 11, e0165542.
- 516 Gamero, A., et. al. (2017). Tracking progress toward EU biodiversity strategy targets: EU policy  
517 effects in preserving its common farmland birds. *Conservation Letters*, 10(4), 395-402.
- 518 Gardner, R. C., & Davidson, N. C. (2011). The Ramsar convention. In *Wetlands* (pp. 189-203).  
519 Springer, Dordrecht.
- 520 Gaüzère, P., Doucier, G., Devictor, V., & Kéfi, S. (2019). A framework for estimating species-specific  
521 contributions to community indicators. *Ecological indicators*, 99, 74-82.
- 522 Gaüzère, P., Jiguet, F., & Devictor, V. (2016). Can protected areas mitigate the impacts of climate  
523 change on bird's species and communities?. *Diversity and Distributions*, 22(6), 625-637.
- 524 Gilroy, J. J., Gill, J. A., Butchart, S. H., Jones, V. R., & Franco, A. M. (2016). Migratory diversity predicts  
525 population declines in birds. *Ecology letters*, 19(3), 308-317.
- 526 Gillingham, P. K., et. al. (2015). The effectiveness of protected areas in the conservation of species  
527 with changing geographical ranges. *Biological Journal of the Linnean Society*, 115(3), 707-717.
- 528 Godet, L., & Devictor, V. (2018). What conservation does. *Trends in ecology & evolution*, 33(10), 720-  
529 730.
- 530 Gunnarsson, G., Waldenström, J., & Fransson, T. (2012). Direct and indirect effects of winter  
531 harshness on the survival of Mallards *Anas platyrhynchos* in northwest Europe. *Ibis*, 154(2), 307-317.
- 532 Hiley, J. R., Bradbury, R. B., Holling, M., & Thomas, C. D. (2013). Protected areas act as establishment  
533 centres for species colonizing the UK. *Proceedings of the Royal Society B: Biological Sciences*,  
534 280(1760), 20122310.



- 535 Hill, J. K., Collingham, Y. C., Thomas, C. D., Blakeley, D. S., Fox, R., Moss, D., & Huntley, B. (2001).  
536 Impacts of landscape structure on butterfly range expansion. *Ecology Letters*, 4(4), 313-321.
- 537 Hole, D. G., et al. (2009). Projected impacts of climate change on a continent-wide protected area  
538 network. *Ecology letters*, 12(5), 420-431.
- 539 IPBES (2018a): The IPBES regional assessment report on biodiversity and ecosystem services for  
540 Africa. Archer, E. Dziba, L., Mulongoy, K. J., Maoela, M. A., and Walters, M. (eds.). Secretariat of the  
541 Intergovernmental Science-Policy Platform on Biodiversity and Ecosystem Services, Bonn, Germany.  
542 492 pages. <http://doi.org/10.5281/zenodo.3236178>
- 543 IPBES (2018b): Summary for policymakers of the regional assessment report on biodiversity and  
544 ecosystem services for Europe and Central Asia of the Intergovernmental Science-Policy Platform on  
545 Biodiversity and Ecosystem Services. M. Fischer, M. Rounsevell, A. Torre-Marín, A. Mader, A.  
546 Church, M. Elbakidze, V. Elias, T. Hahn, P.A. Harrison, J. Hauck, B. Martín-López, I. Ring, C.  
547 Sandström, I. Sousa Pinto, P. Visconti, N.E. Zimmermann and M. Christie (eds.). IPBES secretariat,  
548 Bonn, Germany. 48 pages <https://doi.org/10.5281/zenodo.3237428>
- 549 IPCC (2014). Climate change 2014: synthesis report. Contribution of Working Groups I. *II and III to*  
550 *the fifth assessment report of the Intergovernmental Panel on Climate Change*, 151.
- 551 Johnston, A., et. al. (2013). Observed and predicted effects of climate change on species abundance  
552 in protected areas. *Nature Climate Change*, 3(12), 1055.
- 553 Kerbiriou C, Le Viol I, Jiguet F, Devictor V (2009) More species, fewer specialists: 100 years of  
554 changes in community composition in an island biogeographical study. *Diversity and Distributions*,  
555 **15**, 641–648.
- 556 Ławicki, Ł. (2014). The Great White Egret in Europe: population increase and range expansion since  
557 1980. *British Birds*, 107(1), 8-25.
- 558 Lawson, C. R., Bennie, J. J., Thomas, C. D., Hodgson, J. A., & Wilson, R. J. (2014). Active management  
559 of protected areas enhances metapopulation expansion under climate change. *Conservation Letters*,  
560 7(2), 111-118.
- 561 Lehikoinen, A., et. al. (2013). Rapid climate driven shifts in wintering distributions of three common  
562 waterbird species. *Global change biology*, 19(7), 2071-2081.
- 563 Lehikoinen, P., Santangeli, A., Jaatinen, K., Rajasärkkä, A., & Lehikoinen, A. (2019). Protected areas  
564 act as a buffer against detrimental effects of climate change—Evidence from large-scale, long-term  
565 abundance data. *Global change biology*, 25(1), 304-313.
- 566 Maclean, I. M., et. al. (2008). Climate change causes rapid changes in the distribution and site  
567 abundance of birds in winter. *Global Change Biology*, 14(11), 2489-2500.
- 568 Magnusson A., Skaug H., Nielsen A., Berg C., Kristensen K., Maechler M., van Bentham K., Bolker B. &  
569 Brooks M. M. 2017. Package ‘glmmTMB’.
- 570 Marion, L., & Bergerot, B. (2018). Northern range shift may be due to increased competition induced  
571 by protection of species rather than to climate change alone. *Ecology and evolution*, 8(16), 8364-  
572 8379.
- 573 Monastersky, R. (2014). Biodiversity: Life—a status report. *Nature News*, 516(7530), 158.
- 574 Monzón, J., Moyer-Horner, L., & Palamar, M. B. (2011). Climate change and species range dynamics  
575 in protected areas. *Bioscience*, 61(10), 752-761.
- 576 Morice, C. P., Kennedy, J. J., Rayner, N. A., & Jones, P. D. (2012). Quantifying uncertainties in global  
577 and regional temperature change using an ensemble of observational estimates: The HadCRUT4  
578 data set. *Journal of Geophysical Research: Atmospheres*, 117(D8).

- 579 Opdam, P., & Wascher, D. (2004). Climate change meets habitat fragmentation: linking landscape  
580 and biogeographical scale levels in research and conservation. *Biological conservation*, 117(3), 285-  
581 297.
- 582 Parmesan, C., & Yohe, G. (2003). A globally coherent fingerprint of climate change impacts across  
583 natural systems. *Nature*, 421(6918), 37.
- 584 Pavón-Jordán, D., et. al. (2019). Habitat-and species-mediated short-and long-term distributional  
585 changes in waterbird abundance linked to variation in European winter weather. *Diversity and*  
586 *Distributions*, 25(2), 225-239.
- 587 Pavón-Jordán, D., Fox, A. D., Clausen, P., Dagys, M., Deceuninck, B., Devos, K., ... & Langendoen, T.  
588 (2015). Climate-driven changes in winter abundance of a migratory waterbird in relation to EU  
589 protected areas. *Diversity and Distributions*, 21(5), 571-582.
- 590 Pavón-Jordán et al. Towards a more robust network of protected areas for migratory birds  
591 associated with wetlands across Europe and North Africa under climate change. Under revision in  
592 *Biological Conservation*.
- 593 Peach, M. A., Cohen, J. B., Frair, J. L., Zuckerberg, B., Sullivan, P., Porter, W. F., & Lang, C. (2019).  
594 Value of protected areas to avian persistence across 20 years of climate and land-use change.  
595 *Conservation Biology*, 33(2), 423-433.
- 596 R. C. Team (2017). R: A language and environment for statistical computing. R Foundation for  
597 Statistical Computing (Versión 3.4. 3).
- 598 Reneerkens, J., et al. (2019). Low fitness at low latitudes: wintering in the tropics increases migratory  
599 delays and mortality rates in an arctic-breeding shorebird. *Journal of Animal Ecology*.
- 600 Santangeli, A., & Lehikoinen, A. (2017). Are winter and breeding bird communities able to track rapid  
601 climate change? Lessons from the high North. *Diversity and Distributions*, 23(3), 308-316.
- 602 Schummer, M. L., Kaminski, R. M., Raedeke, A. H., & Graber, D. A. (2010). Weather-related indices of  
603 autumn–winter dabbling duck abundance in middle North America. *The Journal of Wildlife*  
604 *Management*, 74(1), 94-101.
- 605 Thomas, C. D., et. al. (2012). Protected areas facilitate species' range expansions. *Proceedings of the*  
606 *National Academy of Sciences*, 109(35), 14063-14068.
- 607 Thomas, C. D., & Lennon, J. J. (1999). Birds extend their ranges northwards. *Nature*, 399(6733), 213.
- 608 Tittensor, D. P., et al. (2014). A mid-term analysis of progress toward international biodiversity  
609 targets. *Science*, 346(6206), 241-244.
- 610 Trouwborst, A. (2009). International nature conservation law and the adaptation of biodiversity to  
611 climate change: a mismatch?. *Journal of Environmental Law*, 21(3), 419-442.
- 612 Trouwborst, A. (2011). Conserving European biodiversity in a changing climate: The Bern convention,  
613 the European Union Birds and Habitats Directives and the adaptation of nature to climate change.  
614 *Review of European Community & International Environmental Law*, 20(1), 62-77.
- 615 Trouwborst, A. (2012). Transboundary wildlife conservation in a changing climate: adaptation of the  
616 Bonn Convention on Migratory Species and its daughter instruments to climate change. *Diversity*,  
617 4(3), 258-300.
- 618
- 619

620 Appendix 1. Colonization and extinction patterns revealed by the  $CTI_{sd}$

621 *1. Simulations of the species extinction/colonization in response to temperature increase and*  
622 *subsequent changes of Community Temperature Index (CTI) and standard deviation ( $CTI_{sd}$ ) over time.*

623 Following the Figure 1, four scenarios were simulated (Rcode below). The scenarios were: (1) 'No  
624 colonization-No extinction'; (2) 'Extinction only'; (3) 'Colonization only'; (4) 'Colonization-Extinction'.

625 For each of the four scenarios, we simulated an occurrence matrix for 100 species considered in  
626 three temperature dwelling classes over 25 years (from 1 to 25) and 100 sites. We attributed  
627 different Species Temperature Index (STI) values to the species from a random simulation of STI  
628 values based on a Gaussian distribution of mean 0 and SD 10. Twenty five species were considered  
629 as extreme cold-dwelling species with STI inferior to  $-5^{\circ}\text{C}$ , 50 species were considered as slight cold-  
630 or warm-dwelling species with STI between  $-5^{\circ}\text{C}$  and  $5^{\circ}\text{C}$  and 25 species were considered as extreme  
631 warm dwelling species with STI superior to  $5^{\circ}\text{C}$ . Species occurrence were simulated from a binomial  
632 distribution with different probabilities between the extreme cold-dwelling ( $p=0.25$  or  $p=0.25$ -  
633 year/100, if extinction), slight cold- or warm-dwelling species ( $p=0.75$ ) and extreme warm-dwelling  
634 species ( $p=0$  or  $p=\text{year}/100$ , if colonization). From the 100 original species pool, 1 to 90 species were  
635 randomly removed in order to simulated different environmental filters. We computed the CTI and  
636  $CTI_{sd}$  values per year per site (see Methods). We used generalized linear mixed effects models  
637 (GLMM, Gaussian error distribution) with the CTI or  $CTI_{sd}$  as the response variable, the year as the  
638 explanatory term and the site in random effect. Finally, the estimate temporal slope and its p-value  
639 were collected. We simulated the four scenarios 100 times following this process (Rcode below).

640 Rcode used for the simulations:

```
641 library(glmmTMB);library(dplyr);library(effects);library(ggplot2);library(ggpubr)
642 CTIcalc<-function(x){sum(log(x+1)*STI/sum(log(x+1)))}
643 CTIsdcalc_occ<-function(x){ a<-STI*x;a[a==0]<-NA;sd(a,na.rm=T)}
644
645 M_CTItot=as.data.frame(matrix(nr=4,nc=2));M_CTIsd=as.data.frame(matrix(nr=4,nc=2))
646 M_Simul_CTItot=NULL;M_Simul_CTIsd=NULL
647
648 # STI simulations
649 for(s in 1:100){
650   STI<-as.data.frame(sort(rnorm(1000, mean = 0, sd = 10)))
651   STIwarm<-sort(sample(STI[STI>5], 25))
652   STImid<-sort(sample(STI[STI>(-5)&STI<5], 50))
653   STIcold<-sort(sample(STI[STI<(-5)], 25))
654
655   L_model_occ<-list()
656   for(model in 1:4){
657     warm=cold<-as.data.frame(matrix(nc=25,nr=25*100))
658     mid<-as.data.frame(matrix(nc=50,nr=25*100))
```

```
659   colnames(warm)<-rep(paste0("warm",1:25)); colnames(mid)<-rep(paste0("mid",1:50));colnames(cold)<-
660 rep(paste0("cold",1:25))
661   mid$site<-warm$site<-cold$site<-sort(rep(paste0("site",1:100),25))
662   mid$year<-warm$year<-cold$year<-rep(1993:2017,100)
663   site<-unique(warm$site)
664   tempo_mid=tempo_warm=tempo_cold<-NULL
665
666   #Cold-dwelling species occurrence
667   tempo<-NULL
668   for(i in 1:100){
669     tempo<-subset(cold[,1:25],cold$site==site[i])
670   for(k in 1:25){
671     for(j in 1:25){
672       proba_cold<-c(0.25,(0.25-j/100),0.25,(0.25-j/100))
673       proba<-proba_cold[model]
674       proba[proba<0]<-0
675       tempo[j,k]<-rbinom(1,1,prob=proba)
676     } }
677   tempo_cold<-rbind(tempo_cold,tempo) }
678
679   #Slight cold- and warm-dwelling species occurrence
680   tempo<-NULL
681   for(i in 1:100){
682     tempo<-subset(mid[,1:50],mid$site==site[i])
683   for(k in 1:50){
684     for(j in 1:25){
685       tempo[j,k]<-rbinom(1,1,prob=0.75)
686     } } tempo_mid<-rbind(tempo_mid,tempo) }
687
688   #Warm-dwelling species occurrence
689   tempo<-NULL
690   for(i in 1:100){
691     tempo<-subset(warm[,1:25],warm$site==site[i])
692   for(k in 1:25){
693     for(j in 1:25){
694       proba_warm<-c(0,0,(j/100),(j/100))
695       proba<-proba_warm[model]
696       proba[proba<0]<-0
697       tempo[j,k]<-rbinom(1,1,prob=proba)
698     } }
699   tempo_warm<-rbind(tempo_warm,tempo) }
700
701   #Random species exclusion
702   warm[,1:25]<-tempo_warm;tab_cti<-as.data.frame(cbind(tempo_cold,tempo_mid,warm))
703   tab_cti=tempo=NULL
704   for(i in 1:100){
705     tempo<-subset(tab_cti[,1:100],tab_cti$site==site[i])
706     tempo[,c(sample(1:100,sample(1:90,1),replace=F))]<-0
707     tab_cti<-rbind(tab_cti,tempo) }
708
709   #Model
710   tab_cti$site<-tab_cti1$site;tab_cti$year<-tab_cti1$year
711   STI<-c(STIcold,STImid,STIwarm)
712   tab_cti$CTItot<-apply(tab_cti[,1:100],1,CTIcalc); tab_cti$CTIsd<-apply(tab_cti[,1:100],1,CTIsdcalc_occ)
713   L_model_occ[[model]]<-tab_cti
714   CTI_year<-glmmTMB(CTItot~year+(1|site), family=gaussian(link = "identity"),data=L_model_occ[[model]])
715   CTI_year_sd<-glmmTMB(CTIsd~year+(1|site), family=gaussian(link = "identity"),data=L_model_occ[[model]])
```

```

716 M_CTItot[model,1:2]<-summary(CTI_year)$coefficients$cond[c(2,8)]
717 M_CTIsd[model,1:2]<-summary(CTI_year_sd)$coefficients$cond[c(2,8)]
718 M_Simul_CTItot<-rbind(M_Simul_CTItot,M_CTItot)
719 M_Simul_CTIsd<-rbind(M_Simul_CTIsd,M_CTIsd) }
720
721 M_Simul_CTI<-as.data.frame(cbind(M_Simul_CTItot,M_Simul_CTIsd))

```

A) CTI - Slope

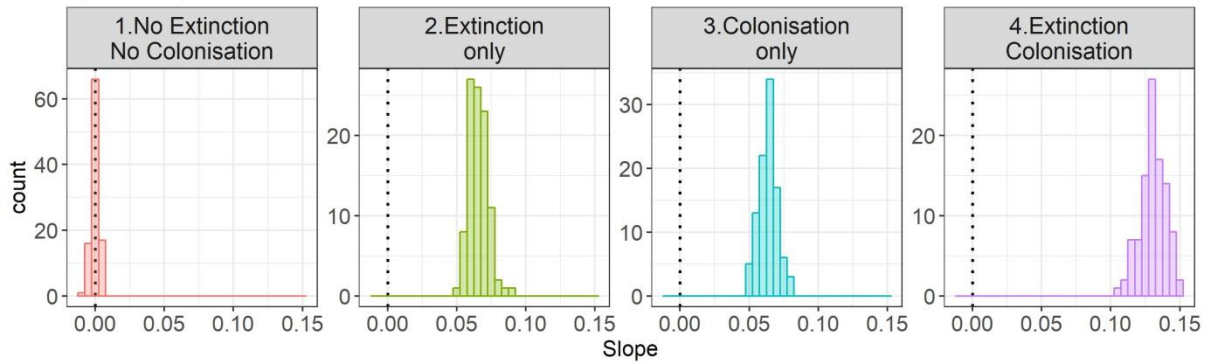

B) CTI - p-value

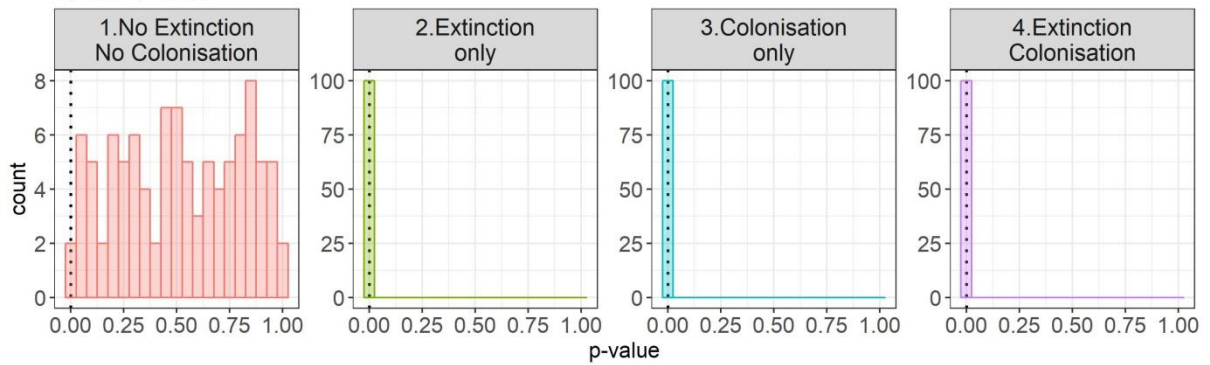

C) CTIsd - Slope

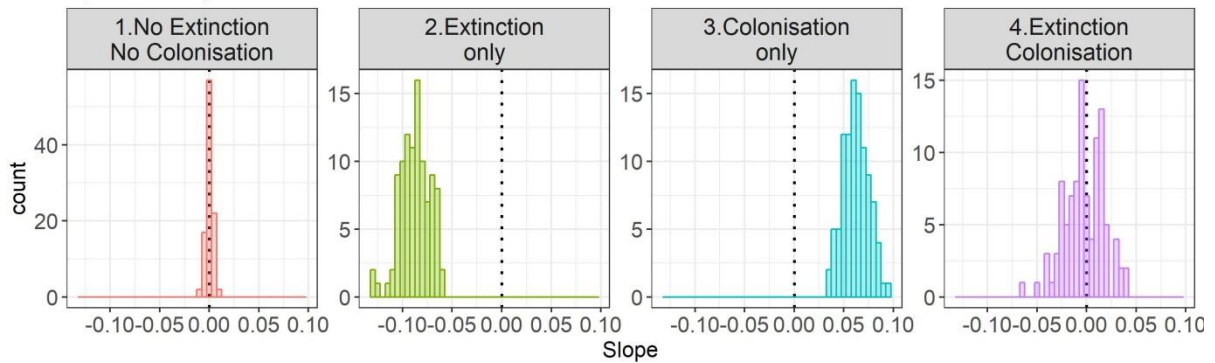

D) CTIsd - p-value

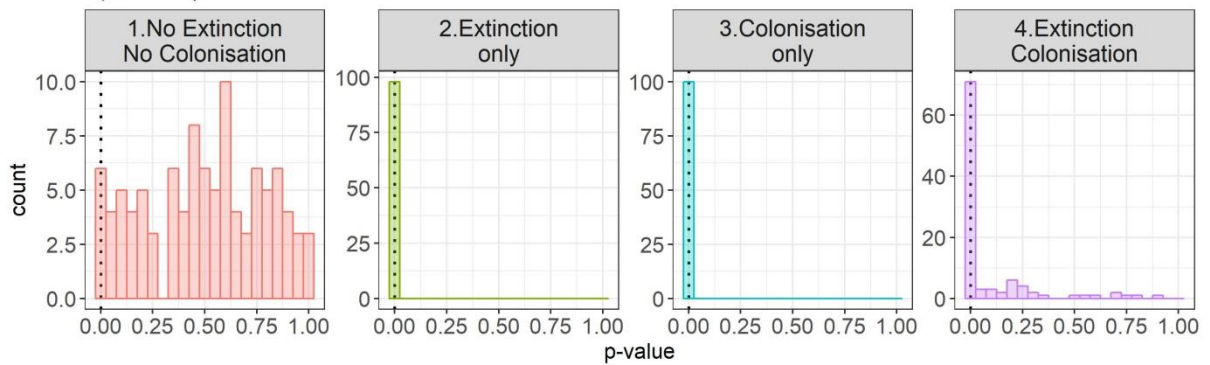

723 Figure S1a: Histograms of the model outputs per scenario. A) CTI estimated slope, B) p-value  
724 corresponding to the CTI slope, C) CTI<sub>sd</sub> estimated slope, D p-value corresponding to the CTI<sub>sd</sub>  
725 slope. The scenarios of community changes in response to temperature increase were: (1) 'No  
726 colonization-No extinction'; (2) 'Extinction only'; (3) 'Colonization only'; (4) 'Colonization-Extinction'.

727

728 *2. Empirical observation of waterbird species extinction/colonization in response to temperature*  
729 *increase and subsequent changes of Community Temperature Index average (CTI) and standard*  
730 *deviation (CTI<sub>sd</sub>) over time.*

731 We highlighted the ability of the CTI<sub>sd</sub> to be an indicator of colonization and extinction processes in  
732 response to climate warming. Indeed, community changes in response to temperature increase  
733 should result in four scenarios: (1) 'No colonization-No extinction' causes no CTI and CTI<sub>sd</sub> changes;  
734 (2) 'Extinction only' causes CTI increase and CTI<sub>sd</sub> decrease by the loss of cold-dwelling species; (3)  
735 'Colonization only' causes CTI and CTI<sub>sd</sub> increase by the gain of warm-dwelling species; (4)  
736 'Colonization-Extinction' causes CTI increase by the species thermal turn-over, but no CTI<sub>sd</sub>  
737 directional change (Fig. 1). We classified the count events in the four scenarios of colonization  
738 and/or extinction events, following what happening between the monitoring year and the next one  
739 (e.g., if between the counts  $i$  and  $i+1$  only one species colonized the site, the count  $i$  correspond to  
740 the scenario (3) 'Colonization only'). For each count event, we measure the change of CTI<sub>sd</sub> from a  
741 monitoring year and the next one (i.e.,  $\Delta\text{CTI}_{sd}$ ), which is supposed to be superior, inferior or equal to  
742 zero depending of the four colonization/extinction scenarios in response to temperature increase.  
743 We used a GLMM per scenarios (Gaussian error distribution) to investigate if the  $\Delta\text{CTI}_{sd}$  values  
744 correspond to the expected patterns following the four scenarios. Site was added in random factors.

745 Conformely to the expectation under a community adjustment to climate warming, the  $\Delta\text{CTI}_{sd}$  values  
746 was null in case of no extinction and no colonization ( $\beta = 0.000$ ,  $P = 1$ ), significantly negative in case  
747 of extinction only ( $\beta = -0.582$ ,  $P < 0.001$ ), significantly positives in case of colonization only ( $\beta =$   
748  $0.590$ ,  $P < 0.001$ ), and not significantly different from zero in case of extinction and colonization ( $\beta =$   
749  $-0.005$ ,  $P = 0.5$ ) (Fig. S1b).

750



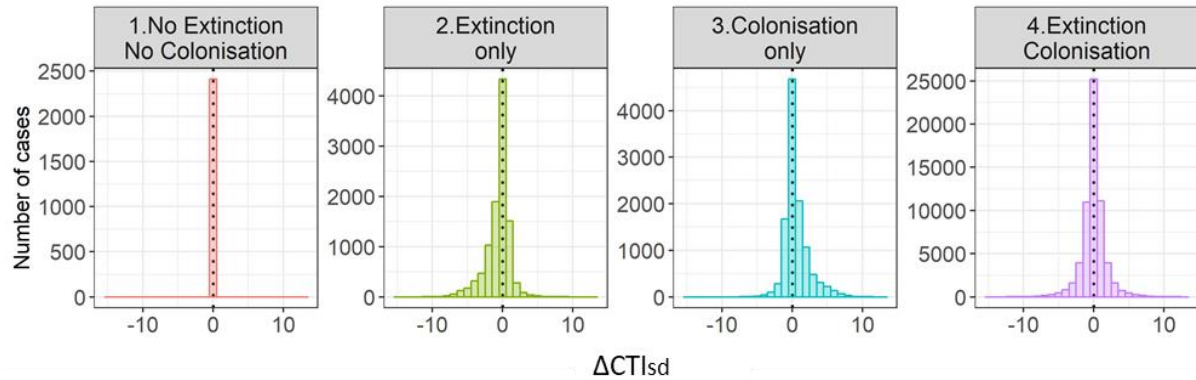

751

752 Figure S1b: Histograms of the  $\Delta CTI_{sd}$  values over the four scenarios of community changes in  
753 response to climate warming: (1) 'No colonization-No extinction' causes no  $CTI_{sd}$  changes, (2)  
754 'Extinction only' causes  $CTI_{sd}$  decrease by the loss of cold-dwelling species, (3) 'Colonization only'  
755 causes  $CTI_{sd}$  increase by the gain of warm-dwelling species, (4) 'Colonization-Extinction' causes no  
756  $CTI_{sd}$  directional change (Fig. 1). The dotted line is positioned on the zero to signify the absence of  
757  $CTI_{sd}$  change.

758 Appendix 2. Details of the monitoring per country

| Country              | Number of sites | Average number of monitoring years | Average covered period | Number of sites included in a protected area | Total waterbird abundance (million) | Monitoring changes |
|----------------------|-----------------|------------------------------------|------------------------|----------------------------------------------|-------------------------------------|--------------------|
| Albania              | 13              | 14.6                               | 22.8                   | 10                                           | 2.67                                | No                 |
| Algeria              | 75              | 15.7                               | 22.0                   | 42                                           | 4.08                                | No                 |
| Austria              | 174             | 20.4                               | 22.8                   | 68                                           | 2.76                                | No                 |
| Belarus              | 4               | 8.3                                | 20.5                   | 1                                            | 0.10                                | No                 |
| Belgium:Flanders     | 472             | 19.8                               | 22.6                   | 234                                          | 5.83                                | Yes                |
| Belgium:Wallonia     | 180             | 13.0                               | 15.9                   | 48                                           | 0.71                                | No                 |
| Bosnia & Herzegovina | 1               | 11.0                               | 16.0                   | 0                                            | 0.02                                | No                 |
| Bulgaria             | 46              | 18.7                               | 22.2                   | 36                                           | 6.90                                | No                 |
| Croatia              | 32              | 11.5                               | 21.5                   | 26                                           | 1.50                                | No                 |
| Cyprus               | 12              | 15.8                               | 22.4                   | 8                                            | 0.27                                | No                 |
| Czechia              | 215             | 15.7                               | 22.3                   | 60                                           | 2.38                                | No                 |
| Denmark              | 48              | 22.1                               | 23.5                   | 35                                           | 6.21                                | Yes                |
| Estonia              | 4               | 19.0                               | 19.5                   | 3                                            | 0.06                                | No                 |
| Finland              | 172             | 15.9                               | 21.5                   | 101                                          | 0.89                                | No                 |
| France               | 291             | 22.3                               | 23.3                   | 137                                          | 52.60                               | No                 |
| Germany              | 1057            | 15.6                               | 19.1                   | 749                                          | 35.02                               | No                 |
| Greece               | 92              | 13.0                               | 19.2                   | 72                                           | 8.26                                | No                 |
| Hungary              | 25              | 17.1                               | 20.9                   | 19                                           | 2.91                                | No                 |
| Ireland              | 255             | 14.4                               | 19.3                   | 61                                           | 6.02                                | Yes                |
| Italy                | 458             | 17.9                               | 20.7                   | 241                                          | 32.84                               | No                 |
| Latvia               | 144             | 13.5                               | 22.1                   | 71                                           | 0.82                                | No                 |
| Lithuania            | 5               | 13.6                               | 22.2                   | 4                                            | 0.78                                | No                 |
| Montenegro           | 1               | 22.0                               | 24.0                   | 1                                            | 2.90                                | No                 |
| Morocco              | 65              | 11.9                               | 21.6                   | 36                                           | 6.66                                | No                 |
| Netherlands          | 173             | 23.8                               | 22.9                   | 59                                           | 98.62                               | No                 |
| North Macedonia      | 2               | 13.5                               | 20.0                   | 2                                            | 0.55                                | No                 |
| Norway               | 57              | 16.6                               | 23.5                   | 28                                           | 0.36                                | No                 |
| Poland               | 12              | 10.5                               | 21.5                   | 10                                           | 0.22                                | No                 |
| Portugal             | 13              | 17.3                               | 22.5                   | 11                                           | 2.66                                | No                 |
| Romania              | 34              | 11.1                               | 17.5                   | 34                                           | 1.75                                | Yes                |
| Serbia               | 2               | 5.5                                | 20.5                   | 0                                            | 0.07                                | No                 |
| Slovakia             | 80              | 10.8                               | 14.5                   | 39                                           | 0.82                                | No                 |
| Slovenia             | 2               | 16.5                               | 20.5                   | 2                                            | 0.04                                | No                 |
| Spain                | 780             | 13.5                               | 19.2                   | 351                                          | 23.63                               | No                 |
| Sweden               | 705             | 17.6                               | 22.7                   | 243                                          | 8.64                                | Yes                |
| Switzerland          | 100             | 22.6                               | 23.2                   | 24                                           | 13.40                               | No                 |
| Tunisia              | 31              | 10.9                               | 22.9                   | 11                                           | 3.27                                | No                 |
| Turkey               | 45              | 7.8                                | 19.1                   | 5                                            | 8.65                                | No                 |
| Ukraine              | 11              | 9.7                                | 17.7                   | 8                                            | 1.70                                | No                 |
| United Kingdom       | 1615            | 18.0                               | 21.1                   | 660                                          | 50.07                               | Yes                |



759 Appendix 3. Additional species information.

760 The winter STI is the long-term average January temperature (WorldClim database, 1950-2000,  
761 <http://worldclim.org/>) experimented by the species across its non-breeding (overwintering)  
762 distribution (extracted from [www.birdlife.org](http://www.birdlife.org) 2015) only inside the African-Eurasian region defined  
763 by the African-Eurasian Migratory Waterbird Agreement (AEWA, <http://www.unep-aewa.org>). We  
764 removed the distribution of the sub-species resident in sub-Saharan Africa to avoid an  
765 overestimation of the thermal affinity tolerated by the studied populations (Involved species: *Ardea*  
766 *alba*, *Ardea cinerea*, *Botaurus stellaris*, *Gallinula chloropus*, *Phalacrocorax carbo*, *Podiceps cristatus*,  
767 *Podiceps nigricollis*, *Porphyrio porphyrio* and *Tachybaptus ruficollis*). Species considered as vagrant  
768 when their overwintering distribution was not included in the AEWA area and in the Western-  
769 Palearctic with a minimum threshold of 500 individuals over the 25 years.

770 Table S2: List of the species with their species temperature index (STI) and the number of sites  
771 occupied at least once.

| Scientific name                | STI   | Number of sites occupied |
|--------------------------------|-------|--------------------------|
| <i>Actitis hypoleucos</i>      | 23.16 | 1274                     |
| <i>Anas acuta</i>              | 16.90 | 2696                     |
| <i>Anas clypeata</i>           | 14.91 | 4929                     |
| <i>Anas crecca</i>             | 12.72 | 6854                     |
| <i>Anas penelope</i>           | 16.53 | 1642                     |
| <i>Anas platyrhynchos</i>      | -0.02 | 3770                     |
| <i>Anas strepera</i>           | 11.73 | 734                      |
| <i>Anser albifrons</i>         | 2.53  | 93                       |
| <i>Anser anser</i>             | 4.47  | 1229                     |
| <i>Anser brachyrhynchus</i>    | 2.02  | 2246                     |
| <i>Anser erythropus</i>        | 2.43  | 6239                     |
| <i>Anser fabalis</i>           | -2.51 | 586                      |
| <i>Ardea alba</i>              | 5.41  | 4994                     |
| <i>Ardea cinerea</i>           | 4.32  | 5303                     |
| <i>Arenaria interpres</i>      | 17.86 | 1696                     |
| <i>Aythya ferina</i>           | 11.34 | 744                      |
| <i>Aythya fuligula</i>         | 10.45 | 857                      |
| <i>Aythya marila</i>           | 0.43  | 577                      |
| <i>Aythya nyroca</i>           | 9.77  | 1444                     |
| <i>Botaurus stellaris</i>      | 17.73 | 182                      |
| <i>Branta bernicla</i>         | 2.86  | 853                      |
| <i>Branta leucopsis</i>        | 1.69  | 4057                     |
| <i>Branta ruficollis</i>       | 1.10  | 539                      |
| <i>Bubulcus ibis</i>           | 22.96 | 1297                     |
| <i>Bucephala clangula</i>      | -1.11 | 420                      |
| <i>Calidris alba</i>           | 18.86 | 254                      |
| <i>Calidris alpina</i>         | 11.83 | 467                      |
| <i>Calidris canutus</i>        | 19.08 | 550                      |
| <i>Calidris maritima</i>       | -2.48 | 498                      |
| <i>Calidris minuta</i>         | 22.77 | 697                      |
| <i>Charadrius alexandrinus</i> | 19.20 | 630                      |

|                                    |       |      |
|------------------------------------|-------|------|
| <i>Charadrius hiaticula</i>        | 22.11 | 1103 |
| <i>Ciconia ciconia</i>             | 22.95 | 707  |
| <i>Clangula hyemalis</i>           | -2.50 | 2258 |
| <i>Cygnus columbianus</i>          | 2.44  | 5300 |
| <i>Cygnus cygnus</i>               | -1.49 | 1796 |
| <i>Cygnus olor</i>                 | 1.27  | 5837 |
| <i>Egretta garzetta</i>            | 21.26 | 65   |
| <i>Fulica atra</i>                 | 5.86  | 2653 |
| <i>Fulica cristata</i>             | 22.59 | 4535 |
| <i>Gallinula chloropus</i>         | 5.61  | 862  |
| <i>Gallinago gallinago</i>         | 18.58 | 944  |
| <i>Gavia arctica</i>               | 0.76  | 581  |
| <i>Gavia stellata</i>              | 3.05  | 949  |
| <i>Grus grus</i>                   | 14.72 | 379  |
| <i>Haematopus ostralegus</i>       | 15.34 | 549  |
| <i>Himantopus himantopus</i>       | 22.13 | 4140 |
| <i>Larus minutus</i>               | 3.70  | 172  |
| <i>Larus argentatus</i>            | 4.58  | 3413 |
| <i>Larus audouinii</i>             | 11.45 | 2046 |
| <i>Larus canus</i>                 | 1.62  | 207  |
| <i>Larus fuscus</i>                | 18.58 | 1707 |
| <i>Larus genei</i>                 | 11.90 | 607  |
| <i>Larus marinus</i>               | -2.49 | 4695 |
| <i>Larus melanocephalus</i>        | 9.31  | 478  |
| <i>Larus ridibundus</i>            | 6.58  | 596  |
| <i>Limosa lapponica</i>            | 19.23 | 4323 |
| <i>Limosa limosa</i>               | 21.01 | 3760 |
| <i>Marmaronetta angustirostris</i> | 5.95  | 87   |
| <i>Melanitta fusca</i>             | 0.67  | 904  |
| <i>Melanitta nigra</i>             | 2.28  | 838  |
| <i>Mergellus albellus</i>          | -1.58 | 2396 |
| <i>Mergus merganser</i>            | -0.40 | 3945 |
| <i>Mergus serrator</i>             | -1.08 | 1911 |
| <i>Phalacrocorax pygmeus</i>       | 2.74  | 286  |
| <i>Netta rufina</i>                | 5.35  | 1208 |
| <i>Numenius arquata</i>            | 18.89 | 1738 |
| <i>Numenius phaeopus</i>           | 22.06 | 228  |
| <i>Nycticorax nycticorax</i>       | 23.47 | 218  |
| <i>Oxyura leucocephala</i>         | 1.27  | 168  |
| <i>Pelecanus crispus</i>           | 8.37  | 116  |
| <i>Pelecanus onocrotalus</i>       | 22.01 | 71   |
| <i>Phalacrocorax aristotelis</i>   | 2.30  | 499  |
| <i>Phalacrocorax carbo</i>         | 3.70  | 6160 |
| <i>Philomachus pugnax</i>          | 22.96 | 465  |
| <i>Phoenicopterus roseus</i>       | 20.58 | 440  |
| <i>Platalea leucorodia</i>         | 17.95 | 192  |
| <i>Plegadis falcinellus</i>        | 23.14 | 1269 |
| <i>Pluvialis apricaria</i>         | 5.36  | 692  |

|                               |       |      |
|-------------------------------|-------|------|
| <i>Pluvialis squatarola</i>   | 18.84 | 742  |
| <i>Podiceps auritus</i>       | 3.39  | 4742 |
| <i>Podiceps cristatus</i>     | 3.25  | 798  |
| <i>Podiceps grisegena</i>     | 2.27  | 1256 |
| <i>Podiceps nigricollis</i>   | 6.63  | 253  |
| <i>Porphyrio porphyrio</i>    | 8.20  | 1810 |
| <i>Rallus aquaticus</i>       | 4.52  | 563  |
| <i>Recurvirostra avosetta</i> | 22.04 | 1094 |
| <i>Somateria mollissima</i>   | -7.53 | 3114 |
| <i>Tachybaptus ruficollis</i> | 3.54  | 4917 |
| <i>Tadorna ferruginea</i>     | 8.88  | 500  |
| <i>Tadorna tadorna</i>        | 4.30  | 2444 |
| <i>Sterna sandvicensis</i>    | 12.38 | 422  |
| <i>Tringa erythropus</i>      | 21.03 | 473  |
| <i>Tringa nebularia</i>       | 23.16 | 748  |
| <i>Tringa ochropus</i>        | 21.10 | 1475 |
| <i>Tringa totanus</i>         | 15.48 | 1412 |
| <i>Vanellus vanellus</i>      | 4.52  | 2933 |

772

773

774 Appendix 4: Additional monitoring information and CTI correction.

775

776 The International Waterbird Census (IWC) started for some species in the 1960s, but had  
777 comprehensive species coverage by the end of the 1980s. To be cautious, we started the study  
778 period in 1993. However, in some countries gulls and shags were not included directly in the IWC.  
779 The full waterbird species census was performed later in Romania (1999), Belgium (Flandre, 2000),  
780 Denmark (2001), United Kingdom (2002), Ireland (2002) and Sweden (still not full). As a change in  
781 species monitored can artificially affect the community changes, we took these dates into account in  
782 the analyses.

783 The community temperature index (CTI) was corrected to account for the monitoring changes in  
784 countries where the full waterbird species census started after the beginning of the study period  
785 (countries listed above). In these countries, the CTI values before the year(s) of monitoring change  
786 were centred per site (not reduced) and added to the average site CTI value of the years after the  
787 monitoring change. Hence, the addition of new species after the monitoring change doesn't strongly  
788 affect the CTI values (Appendix 4, Table S1). Note that under the hypothesis of a CTI increase over  
789 years, the CTI correction leads to an overestimation of the site CTI average before the monitoring  
790 change. Regarding the  $CTI_{sd}$  no adaptation was done.

791

792 Table S1: Summary of the variance minimum (Min.) median, mean and maximum (Max.) between  
793 the original CTI computed without and with correction.

| Variable        | Min.   | Median | Mean  | Max.   |
|-----------------|--------|--------|-------|--------|
| CTI uncorrected | -5.014 | 5.392  | 5.514 | 22.544 |
| CTI corrected   | -5.014 | 5.382  | 5.516 | 22.544 |

794

795 We performed models with the full dataset and the data subset to control the potential differences.  
796 We used the same model framework as in the Methods section to evaluate the change of CTI,  $CTI_{sd}$ ,  
797 number of cold-dwelling species and number of warm-dwelling species. As a result, the models  
798 outputs were fairly similar between the two dataset, at the exception that warm-dwelling species  
799 did not significantly increased more than cold-dwelling species inside PAs (Appendix 4, Table S2).

800

801

802

803

804

805 Table S2: Comparison of the models with the full dataset and the subset of data with the full species  
 806 monitoring. Protected area (PA) effect on temporal trends of the community temperature index  
 807 (CTI) and standard deviation of the CTI (CTI<sub>sd</sub>), number of cold- and warm-dwelling species. Base line  
 808 is sites outside PA and cold-dwelling species. Years were standardized to zero mean (std.) in the  
 809 thermal-dwellers model and interactions are notified by ‘:’.

| Dataset                             | Variable                | Parameter | Coefficient        | SE    | Z-value | P-value |         |
|-------------------------------------|-------------------------|-----------|--------------------|-------|---------|---------|---------|
| Full dataset                        | CTI                     | Intercept | -6.030             | 1.696 | -3.554  | < 0.001 |         |
|                                     |                         | Year      | 0.006              | 0.001 | 6.676   | < 0.001 |         |
|                                     |                         | PA        | 7.972              | 2.435 | 3.274   | < 0.001 |         |
|                                     |                         | Year:PA   | 0.004              | 0.001 | 3.412   | < 0.001 |         |
|                                     | CTI <sub>sd</sub>       | Intercept | 4.294              | 1.602 | 2.680   | 0.007   |         |
|                                     |                         | Year      | 0.000              | 0.001 | 0.360   | 0.719   |         |
|                                     |                         | PA        | 11.310             | 2.300 | 4.920   | < 0.001 |         |
|                                     |                         | Year:PA   | 0.006              | 0.001 | 5.066   | < 0.001 |         |
|                                     | Cold- and Warm-dwellers | Dweller   | Intercept          | 1.466 | 0.012   | 125.070 | < 0.001 |
|                                     |                         |           | Year(std.)         | 0.057 | 0.002   | 33.560  | < 0.001 |
|                                     |                         |           | PA                 | 0.163 | 0.017   | 9.600   | < 0.001 |
|                                     |                         |           | Year(std.):PA      | 0.005 | 0.002   | 2.360   | 0.018   |
|                                     |                         |           | Year(std.):Dweller | 0.008 | 0.002   | 3.820   | < 0.001 |
|                                     |                         |           | PA:Dwellers        | 0.022 | 0.003   | 7.360   | < 0.001 |
| Year(std.):PA:Dweller               |                         |           | 0.006              | 0.003 | 1.960   | 0.050   |         |
| Year(std.):PA:Dweller               |                         |           | 0.006              | 0.003 | 1.960   | 0.050   |         |
| Subset with full species monitoring | CTI                     | Intercept | 0.098              | 2.241 | 0.044   | 0.965   |         |
|                                     |                         | Year      | 0.003              | 0.001 | 2.563   | 0.010   |         |
|                                     |                         | PA        | 15.302             | 3.123 | 4.900   | < 0.001 |         |
|                                     |                         | Year:PA   | 0.008              | 0.002 | 4.930   | < 0.001 |         |
|                                     | CTI <sub>sd</sub>       | Intercept | 2.396              | 2.051 | 1.168   | 0.243   |         |
|                                     |                         | Year      | 0.001              | 0.001 | 1.290   | 0.197   |         |
|                                     |                         | PA        | 8.743              | 2.858 | 3.059   | 0.002   |         |
|                                     |                         | Year:PA   | 0.004              | 0.001 | 3.153   | 0.002   |         |
|                                     | Cold- and Warm-dwellers | Dweller   | Intercept          | 1.473 | 0.012   | 124.750 | < 0.001 |
|                                     |                         |           | Year(std.)         | 0.049 | 0.002   | 26.090  | < 0.001 |
|                                     |                         |           | PA                 | 0.166 | 0.017   | 9.720   | < 0.001 |
|                                     |                         |           | Year(std.):PA      | 0.008 | 0.003   | 3.060   | 0.002   |
|                                     |                         |           | Year(std.):Dweller | 0.014 | 0.002   | 6.020   | < 0.001 |
|                                     |                         |           | PA:Dwellers        | 0.024 | 0.003   | 7.460   | < 0.001 |
| Year(std.):PA:Dweller               |                         |           | 0.005              | 0.003 | 1.620   | 0.104   |         |
| Year(std.):PA:Dweller               |                         |           | 0.005              | 0.003 | 1.620   | 0.104   |         |

810

811

812 Appendix 5: Protected area surfaces in the study area. Protected area surface (km<sup>2</sup>) is represented  
813 by points located at the centre of the corresponding cell (5°×5° resolution), which include both  
814 protected and not protected sites and at least 15 sites. The protected area surface corresponds to  
815 the sum of the PA surfaces per cell. The size of the points indicates the protected area surface size.

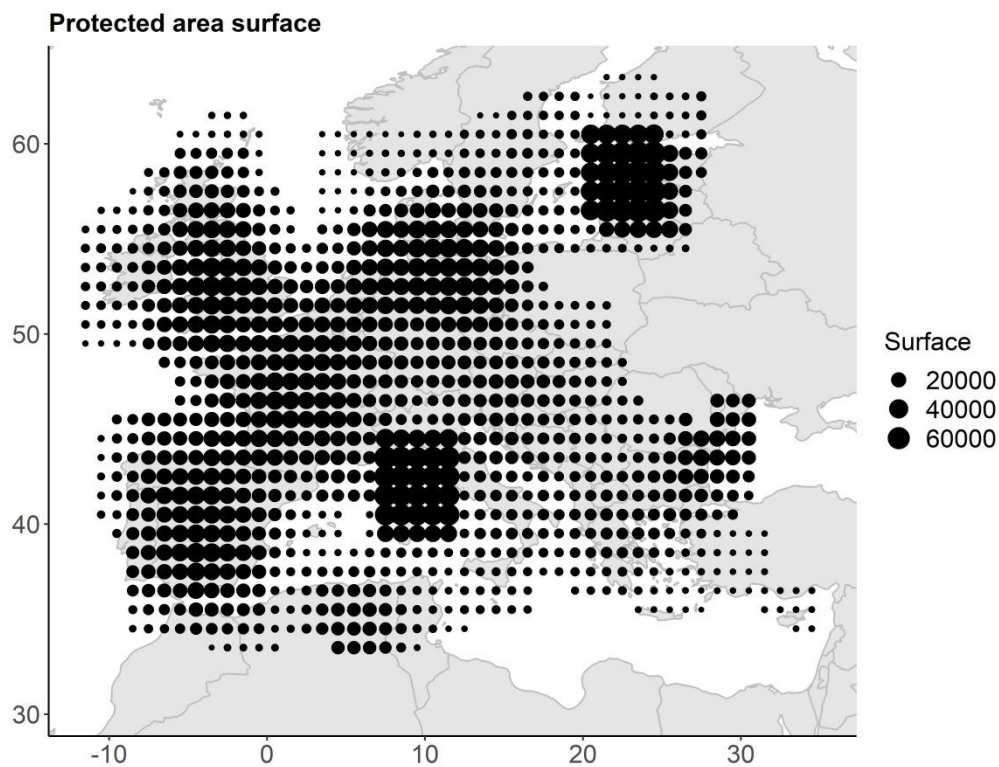

816

817
